## CAPE- $pNO_2$ ameliorated diabetic nephropathy through regulating the Akt/NF- $\kappa B$ / iNOS pathway in STZ-induced diabetic mice

Xiaoling Wang<sup>1,\*</sup>, Dejuan Li<sup>1,\*</sup>, Lu Fan<sup>1</sup>, Qianhan Xiao<sup>1</sup>, Hua Zuo<sup>1</sup> and Zhubo Li<sup>1</sup>

<sup>1</sup>College of Pharmaceutical Sciences, Southwest University, Chongqing 400716, China

\*Co-first authors

Correspondence to: Zhubo Li, email: lizhubo2007@163.com

**Keywords:** caffeic acid *p*-nitro phenethyl ester (CAPE- $pNO_2$ ); diabetic nephropathy (DN); glomerular mesangial cells (GMCs); Akt/NF- $\kappa B$ / iNOS pathway

Received: August 18, 2017

Accepted: November 14, 2017

Published: December 07, 2017

**Copyright:** Wang et al. This is an open-access article distributed under the terms of the Creative Commons Attribution License 3.0 (CC BY 3.0), which permits unrestricted use, distribution, and reproduction in any medium, provided the original author and source are credited.

### ABSTRACT

**Diabetic nephropathy (DN) is one of the most severe complications of diabetes mellitus. This study aimed to determine the effects and potential mechanism of caffeic acid para-nitro phenethyl ester (CAPE- $pNO_2$ ), a derivative of caffeic acid phenethyl ester (CAPE), on DN; *In vivo*, intraperitoneal injections of streptozotocin (STZ) were used to induce diabetes in mice; then, the mice were intraperitoneally injected daily with CAPE or CAPE- $pNO_2$  for 8 weeks. The mice were sacrificed, and blood samples and kidney tissues were collected to measure biological indexes. The results showed that CAPE and CAPE- $pNO_2$  could lower serum creatinine, blood urea nitrogen, 24-h albumin excretion, malondialdehyde and myeloperoxidase levels and increase superoxide dismutase activity in diabetic mice. According to HE, PAS and Masson staining, these two compounds ameliorated structural changes and fibrosis in the kidneys. In addition, the immunohistochemical and western blot results showed that CAPE and CAPE- $pNO_2$  inhibited inflammation through the Akt/NF- $\kappa B$  pathway and prevented renal fibrosis through the TGF- $\beta$ /Smad pathway. *In vitro*, CAPE and CAPE- $pNO_2$  inhibited glomerular mesangial cell (GMC) proliferation, arrested cell cycle progression and suppressed ROS generation. These compounds also inhibited ECM accumulation via regulating the TGF- $\beta 1$ , which was a similar effect to that of the NF- $\kappa B$  inhibitor PDTC. More importantly, CAPE and CAPE- $pNO_2$  could up-regulate nitric oxide synthase expression in STZ-induced diabetic mice and HG-induced GMCs. CAPE- $pNO_2$  had stronger effects than CAPE both *in vivo* and *in vitro*. These data suggest that CAPE- $pNO_2$  ameliorated DN by suppressing oxidative stress, inflammation, and fibrosis via the Akt/NF- $\kappa B$ / iNOS pathway.**

### INTRODUCTION

Diabetic nephropathy (DN) is one of the major microvascular complications of diabetes and could be a common cause of chronic kidney disease (CKD) [1]. It has been reported that DN may lead to end-stage renal disease (ESRD) in both type 1 and type 2 diabetes mellitus; ESRD is becoming the most prevalent cause of morbidity and complications due to diabetes, and it is characterized by glomerular extracellular matrix (ECM) deposition, glomerular basement membrane thickening,

glomerular mesangial cell (GMC) proliferation and metabolic abnormalities [2–5]. The pathogenesis of DN is complex and remains unclear. The mechanisms underlying the development of DN are generally considered to be oxidative stress, inflammation and fibrosis [6].

Oxidative stress is regarded as one of the major causes of the pathogenesis of DN, and oxidative stress caused by a chronic increase in reactive oxygen species (ROS) levels plays a pivotal role in kidney disease [7]. NOX4 (NADPH oxidase 4) plays a major role in ROS production; it is highly expressed in the kidneys and is

an important homeostatic regulator in the pathogenesis of early-stage DN [8–10]. ROS generation can directly trigger a variety of stress-sensitive pathways and activate various downstream elements; and inflammation is a major response mediated by oxidative stress [11–12]. It has been reported that in DN, the overexpression of pro-inflammatory cytokines and chemokines, which include tumor necrosis factor- $\alpha$  (TNF- $\alpha$ ), interleukin-1 $\beta$  (IL-1 $\beta$ ) and interleukin-6 (IL-6), are associated with the NF- $\kappa$ B pathway in the inflammatory phase [13–16]. In addition, Akt is activated in streptozotocin (STZ)-induced diabetic mice and increases NF- $\kappa$ B transcription to promote DN progression; thus, NF- $\kappa$ B is a major downstream target of Akt [17, 18]. Activated NF- $\kappa$ B can also be transferred to the nucleus and induce the expression of its downstream target gene TGF- $\beta$ 1 to cause ECM accumulation, which leads to fibrosis in DN [19].

GMCs maintained the normal function of glomeruli, which belong to one of the five cell types of the kidneys. Their abnormal activation and phenotypic changes cause a series of lesions on the renal structure and alter renal function in DN [20–22]. High D-glucose (HG) promoted proliferation and hypertrophy in GMCs and induced high levels of ROS, which resulted in excessive ECM synthesis *in vitro*. The accumulation and increase in ECM components, such as collagen and fibronectin, in GMCs are hallmarks of the development of DN and contribute to renal fibrosis [23–27].

Nitric oxide (NO) is an important factor in renal hemodynamic regulation, and the role of NO in DN is complex. It is generally accepted that NO is overproduced in the early stage of DN and mediates glomerular hyperfiltration, but in the late stage of DN, NO levels are rapidly decreased and lead to glomerular sclerosis; these effects of NO are a double-edged sword in DN patients [28–30]. In animal models of CKD, blocking endothelial NO leads to an increase in microvascular disease, which is known to impair renal autoregulation [31]. Inducible nitric oxide synthase (iNOS) is the main unit of NO synthesis, and its levels are high during the early phase of wound healing; however, during the later phase of wound healing, paeoniflorin can promote iNOS synthesis in high glucose-induced macrophages through TLR2-dependent signaling pathways to alleviate the severity of DN [32, 33]. Therefore, NO concentrations and iNOS expression may be essential elements that need to be explored in DN.

Caffeic acid phenethyl ester (CAPE) has been identified as the main active component of *propolis* and has been reported to possess various pharmacological activities, including anti-oxidant, anti-inflammatory, anti-cancer, anti-fibrosis, anti-proliferation and anti-bacterial properties [34, 35]. It has been reported that CAPE attenuates fibrosis via inhibiting the TGF- $\beta$ 1/Smad3 pathway; in addition, CAPE can lower the expression levels of renal inflammatory chemokines and reversed

the levels of SOD and MDA [36, 37]. In another study, it was found that treatment with CAPE could protect two murine cell lines from oxidative stress by inducing cellular anti-oxidant activity and preserving cellular morphology; CAPE is also an inhibitor of NF- $\kappa$ B that can suppress NF- $\kappa$ B transcription to lower the expression levels of inflammatory cytokines, such as IL-6, IL- $\beta$  and TNF- $\alpha$  [38–41].

In our previous study, caffeic acid para-nitro phenethyl ester (CAPE-*p*NO<sub>2</sub>), a derivative of CAPE, was designed and synthesized; CAPE-*p*NO<sub>2</sub> had high anti-oxidative, anti-inflammatory and anti-colon cancer activities and protected against acute myocardial ischemia-reperfusion injury and promoted NO content in rat hearts [42, 43]. The structures of CAPE and CAPE-*p*NO<sub>2</sub> are shown in Figure 1A and 1B.

In the present study, the differences between the effects of CAPE and CAPE-*p*NO<sub>2</sub> on DN were examined. The objectives of this study were 1) to measure physiological and biochemical indexes in STZ-induced diabetic mice, 2) to examine the morphology changes by HE, PAS and Masson staining, and 3) to determine whether the better effects of CAPE-*p*NO<sub>2</sub> on DN occurred via the Akt/NF- $\kappa$ B/iNOS pathway using *in vivo* and *in vitro* methods.

## RESULTS

### Effects of CAPE and CAPE-*p*NO<sub>2</sub> treatment on biochemical indexes in diabetic mice

For eight weeks, body weights and FBG levels were recorded (Figure 1C, 1D). The body weights, FBG levels and kidney-to-body weight ratios (Figure 1E) in the diabetes group were  $25.17 \pm 0.94$  g,  $20.32 \pm 2.56$  mM and  $1.73 \pm 0.08\%$ , respectively, while those in the control group were  $42.67 \pm 1.29$  g,  $5.06 \pm 0.28$  mM and  $1.44 \pm 0.14\%$ , respectively. After treatment with CAPE or CAPE-*p*NO<sub>2</sub> for 8 weeks, the body weights significantly increased to  $30.15 \pm 0.19$  g,  $32.35 \pm 0.13$  g and  $32.89 \pm 1.16$  g in the CAPE, low CAPE-*p*NO<sub>2</sub> and high CAPE-*p*NO<sub>2</sub> groups, respectively ( $p < 0.05$ ). Moreover, FBG levels were  $14.06 \pm 1.43$  mM,  $13.36 \pm 2.31$  mM and  $12.66 \pm 1.11$  mM, and the kidney-to-body weight ratios were  $1.63 \pm 0.19\%$ ,  $1.58 \pm 0.14\%$  and  $1.52 \pm 0.12\%$  in the CAPE, low CAPE-*p*NO<sub>2</sub> and high CAPE-*p*NO<sub>2</sub> groups, respectively. FBG levels were significantly decreased after treatment with CAPE or CAPE-*p*NO<sub>2</sub> ( $p < 0.05$ ), whereas the kidney-to-body weight ratios were significantly different in the high CAPE-*p*NO<sub>2</sub> group only ( $p < 0.05$ ).

BUN, sCr and 24-h Alb levels are shown in Table 1. After eight weeks of treatment, these levels were remarkably increased in the diabetes group compared to those in the control group ( $p < 0.05$ ). However, treatment with CAPE and CAPE-*p*NO<sub>2</sub> caused a significant reversal in these biochemical parameters ( $p < 0.05$ ). TC and TG

levels were also increased in the diabetic mice, but CAPE and CAPE-*p*NO<sub>2</sub> treatment reversed these levels ( $p < 0.05$ ). There was a significant difference between CAPE and CAPE-*p*NO<sub>2</sub> treatment for 24-h Alb and TG levels ( $p < 0.05$ ) but no differences for BUN, sCr and TC levels.

### Effects of CAPE and CAPE-*p*NO<sub>2</sub> treatment on oxidative stress in diabetic mice

The levels of MDA and SOD were measured to estimate the anti-oxidative effects of CAPE and CAPE-*p*NO<sub>2</sub>. As shown in Figure 2A–2D, MDA levels were increased, and SOD activity was inhibited in diabetic mice ( $p < 0.05$ ). Treatment with CAPE or CAPE-*p*NO<sub>2</sub> remarkably suppressed the MDA levels and increased SOD activity ( $p < 0.05$ ), and the effects of CAPE-*p*NO<sub>2</sub> were much better than those of CAPE in the kidney tissues ( $p < 0.05$ ); however, there was no significant difference in the effects on serum.

NOX4 expression levels were increased 1.4-fold in the diabetes group compared to those in the control group ( $p < 0.05$ ) as shown in Figure 2E and 2F. However, NOX4 expression levels in the CAPE, low CAPE-*p*NO<sub>2</sub> and high CAPE-*p*NO<sub>2</sub> groups were decreased 1.2-, 1.0- and 0.7- fold ( $p < 0.05$ ). In addition, there were significant differences between CAPE and CAPE-*p*NO<sub>2</sub> treatment ( $p < 0.05$ ).

### Effects of CAPE and CAPE-*p*NO<sub>2</sub> treatment on the kidney structure and fibrosis in diabetic mice

According to HE and PAS staining (Figure 3A, 3B), the control group had intact glomeruli and tubule morphology, whereas the diabetes group had basement membrane thickening of the renal tubules and glomerular hypertrophy. After treatment with CAPE and CAPE-*p*NO<sub>2</sub> for 8 weeks, the renal structures were improved compared with those in diabetic mice.

For Masson staining, the blue-colored areas of the kidney tissues represent collagen, which indicates fibrosis (Figure 3C, 3D). The deposition of collagen in the glomerular and tubular lumen was 2.5-fold higher in the diabetes group than in the control group ( $p < 0.05$ ), whereas that in the CAPE, low CAPE-*p*NO<sub>2</sub> and high CAPE-*p*NO<sub>2</sub> groups was decreased 1.8-, 1.5- and 1.3-fold, respectively.

### CAPE and CAPE-*p*NO<sub>2</sub> inhibited inflammation through the Akt/NF- $\kappa$ B pathway in diabetic mice

As shown in Figure 4A and 4B, MPO levels were significantly increased in diabetic mice ( $p < 0.05$ ). CAPE and CAPE-*p*NO<sub>2</sub> injections decreased the MPO levels in the serum and kidney tissues ( $p < 0.05$ ). The expression levels of TNF- $\alpha$ , IL-1 $\beta$  and IL-6, which are pro-inflammatory cytokines and chemokines, were

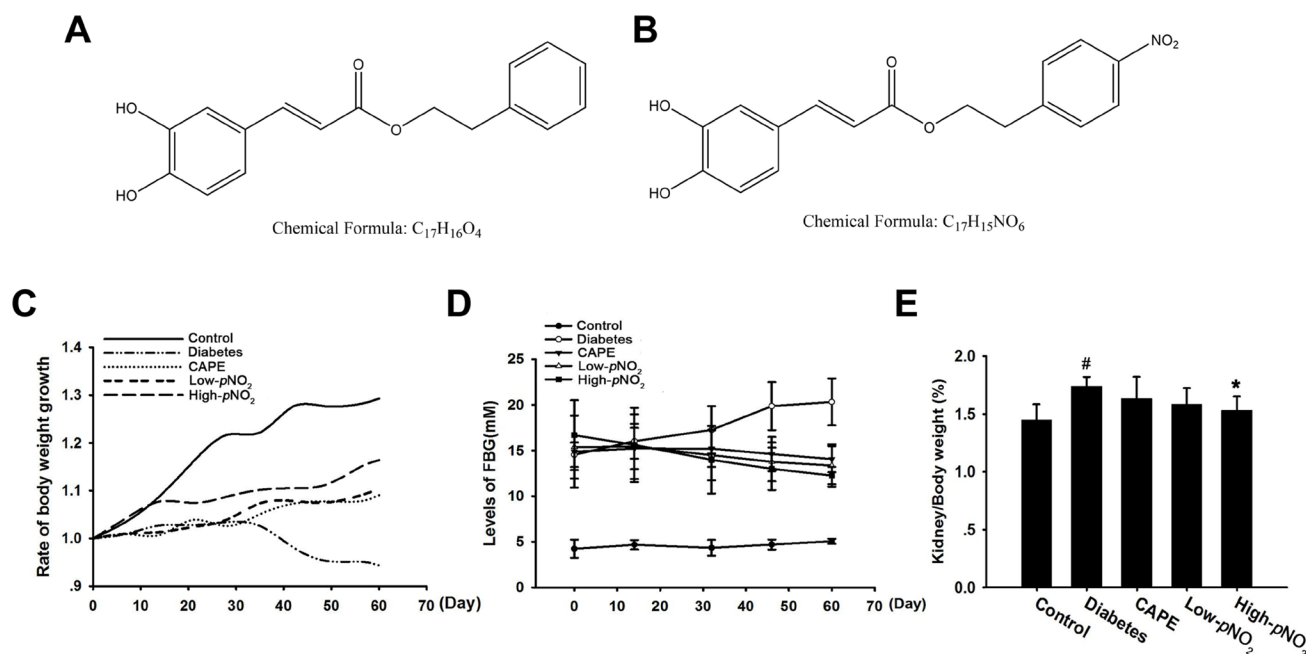

**Figure 1: Effects of CAPE and CAPE-*p*NO<sub>2</sub> treatment on biochemical indexes in diabetic mice.** (A) Chemical structure of CAPE. (B) Chemical structure of CAPE-*p*NO<sub>2</sub>. (C) The changed of the body weight during the 8 weeks. (D) The fast blood glucose. (E) The kidney/body weight. Data are expressed as mean  $\pm$  SD,  $n \geq 6$ . <sup>#</sup> $p < 0.05$  vs. control group; <sup>\*</sup> $p < 0.05$  vs. diabetes group; <sup>†</sup> $p < 0.05$  vs. CAPE group; <sup>‡</sup> $p < 0.05$  vs. Low-*p*NO<sub>2</sub> group. Diabetes: the STZ-induced diabetic mice; CAPE: the STZ-induced diabetic mice treated with CAPE (20  $\mu$ mol/kg/day); Low-*p*NO<sub>2</sub>: the STZ-induced diabetic mice treated with CAPE-*p*NO<sub>2</sub> (20  $\mu$ mol/kg/day); High-*p*NO<sub>2</sub>: the STZ-induced diabetic mice treated with CAPE-*p*NO<sub>2</sub> (40  $\mu$ mol/kg/day).

**Table 1: Effects of CAPE and CAPE-pNO<sub>2</sub> treatment on blood urea nitrogen, serum creatinine, 24 h albumin, triglyceride and cholesterol in diabetic mice**

|              | Control Group | Diabetes Group            | Diabetes + Treatment Group |                                    |                                    |
|--------------|---------------|---------------------------|----------------------------|------------------------------------|------------------------------------|
|              |               |                           | CAPE(20 μmol/kg)           | CAPE-pNO <sub>2</sub> (20 μmol/kg) | CAPE-pNO <sub>2</sub> (40 μmol/kg) |
| sCr (μmol/L) | 46.26 ± 9.09  | 95.96 ± 2.74 <sup>#</sup> | 59.73 ± 1.98 <sup>*</sup>  | 54.38 ± 2.04 <sup>*</sup>          | 43.42 ± 4.79 <sup>*&amp;</sup>     |
| BUN (mmol/L) | 8.02 ± 0.42   | 15.16 ± 1.55 <sup>#</sup> | 12.12 ± 0.24 <sup>*</sup>  | 11.12 ± 1.23 <sup>*</sup>          | 10.67 ± 0.98 <sup>*</sup>          |
| Alb (mg/24h) | 1.31 ± 0.03   | 18.19 ± 0.44 <sup>#</sup> | 12.16 ± 0.53 <sup>*</sup>  | 10.15 ± 0.42 <sup>++</sup>         | 6.68 ± 0.31 <sup>*&amp;</sup>      |
| TC (mmol/L)  | 3.22 ± 0.11   | 4.44 ± 0.06 <sup>#</sup>  | 3.43 ± 0.20 <sup>*</sup>   | 3.32 ± 0.16 <sup>*</sup>           | 3.09 ± 0.05 <sup>*&amp;</sup>      |
| TG (mmol/L)  | 0.77 ± 0.02   | 2.73 ± 0.10 <sup>#</sup>  | 1.87 ± 0.39 <sup>*</sup>   | 1.73 ± 0.05 <sup>++</sup>          | 1.36 ± 0.03 <sup>*&amp;</sup>      |

Data are expressed as mean ± SD, n ≥ 6. <sup>#</sup>p < 0.05 vs. control group; <sup>\*</sup>p < 0.05 vs. diabetes group; <sup>+</sup>p < 0.05 vs. CAPE group; <sup>&</sup>p < 0.05 vs. Low-CAPE-pNO<sub>2</sub> group.

increased in diabetic mice according to western blot and immunohistochemical assays (p < 0.05). Treatment with CAPE and CAPE-pNO<sub>2</sub> down-regulated their expression levels significantly (p < 0.05). In particular, the effects of CAPE-pNO<sub>2</sub> were much greater than those of CAPE on TNF-α (p < 0.05), but there were no significant differences in the levels of IL-1β and IL-6 (Figure 4C–4H).

There is evidence indicating that TNF-α, IL-1β and IL-6 expression can be up-regulated by the NF-κB pathway. As shown in Figure 5A–5G, the expression levels of nuclear p65, p-IκBα, p-Akt and p-PI3K in the NF-κB pathway were all increased, whereas the expression levels of cytoplasm p65 were decreased in the diabetes group (p < 0.05). However, treatment with CAPE and CAPE-pNO<sub>2</sub> decreased nuclear p65, p-IκBα, p-Akt and p-PI3K expression levels

and increased the expression levels of cytoplasm p65 (p < 0.05). In addition, CAPE-pNO<sub>2</sub> was more effective than CAPE, particularly its effects on p-PI3K and p65 (p < 0.05). These results indicated that the inhibition of inflammation caused by CAPE and CAPE-pNO<sub>2</sub> may occur through the Akt/NF-κB pathway in diabetic mice and that the effects of CAPE-pNO<sub>2</sub> were stronger.

### CAPE and CAPE-pNO<sub>2</sub> prevented renal fibrosis through the TGF-β/Smad pathway in diabetic mice

The results of Masson staining indicated that CAPE and CAPE-pNO<sub>2</sub> treatment could rescue renal fibrosis in diabetic mice. As shown in Figure 6A–6G, the expression

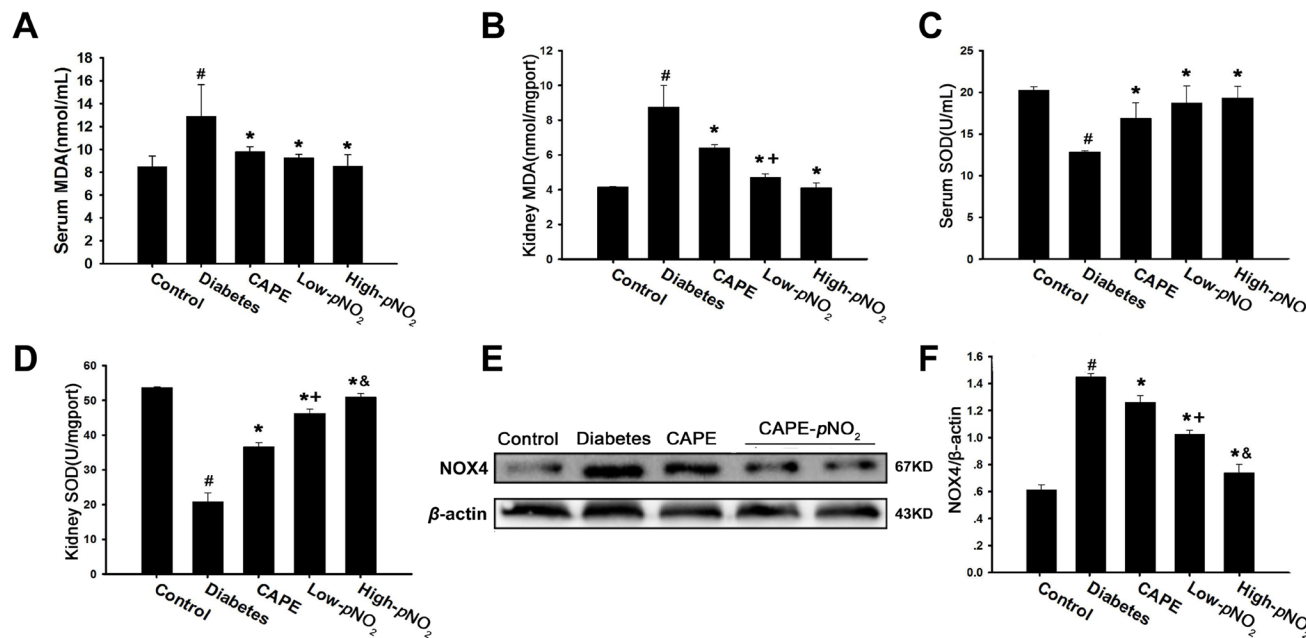

**Figure 2: Effects of CAPE and CAPE-pNO<sub>2</sub> treatment on oxidative stress in diabetic mice.** (A, B) CAPE and CAPE-pNO<sub>2</sub> treatment elevate the SOD activity in serum and kidney tissue. (C, D) CAPE and CAPE-pNO<sub>2</sub> treatment decrease the MDA level in serum and kidney tissue. (E, F) The expression of NOX4 was assessed by western blot analysis. Data are expressed as mean ± SD, n ≥ 6. <sup>#</sup>p < 0.05 vs. control group; <sup>\*</sup>p < 0.05 vs. diabetes group; <sup>+</sup>p < 0.05 vs. CAPE group; <sup>&</sup>p < 0.05 vs. Low-pNO<sub>2</sub> group. Diabetes: the STZ-induced diabetic mice; CAPE: the STZ-induced diabetic mice treated with CAPE (20 μmol/kg/day); Low-pNO<sub>2</sub>: the STZ-induced diabetic mice treated with CAPE-pNO<sub>2</sub> (20 μmol/kg/day); High-pNO<sub>2</sub>: the STZ-induced diabetic mice treated with CAPE-pNO<sub>2</sub> (40 μmol/kg/day).

levels of TGF- $\beta$ 1, collagen IV, fibronectin,  $\alpha$ -SMA and p-Smad2/3, which are associated with the TGF- $\beta$ /Smad pathway, were examined by western blot. The expression levels of all these proteins were obviously up-regulated in the diabetes group ( $p < 0.05$ ). However, the expression levels of these proteins were suppressed by CAPE and CAPE- $pNO_2$  treatment ( $p < 0.05$ ), and the inhibition by CAPE- $pNO_2$  was more powerful than that of CAPE ( $p < 0.05$ ).

### CAPE and CAPE- $pNO_2$ increased NO content via regulating iNOS expression in diabetic mice

As shown in Figure 7A, NO concentrations were suppressed remarkably in diabetic mice ( $p < 0.05$ ) but were increased after treatment with CAPE and CAPE- $pNO_2$ ; the effects of CAPE- $pNO_2$  were better than those of CAPE ( $p < 0.05$ ). Similarly, the results shown in Figure 7B and 7C indicated that iNOS expression was inhibited in the diabetes group ( $p < 0.05$ ), whereas CAPE and CAPE- $pNO_2$  up-regulated iNOS expression; again, CAPE- $pNO_2$  had better effects than CAPE ( $p < 0.05$ ). The effects

of CAPE- $pNO_2$  on NO and iNOS were concentration-dependent.

### CAPE and CAPE- $pNO_2$ suppressed HG-induced GMC proliferation

As shown in Figure 8A, an appropriate concentration of D-glucose (20–40 mM) promoted cell proliferation; however, cell proliferation was suppressed when the D-glucose concentration reached 50 mM. In addition, the cells presented with altered morphology when the concentration reached 40 mM. The cell proliferation induced by 30 mM D-glucose was 120%, 126% and 147% from 6 h to 24 h. Therefore, incubation with 30 mM D-glucose for 24 h was selected as the best condition to imitate hyperglycemia *in vitro*.

GMC proliferation was not changed obviously under normal glucose conditions and 20  $\mu$ M CAPE or CAPE- $pNO_2$  treatment for 6 h as shown in Figure 8B. CAPE and CAPE- $pNO_2$  inhibited HG-induced GMC proliferation ( $p < 0.05$ ), which occurred in a concentration and time-

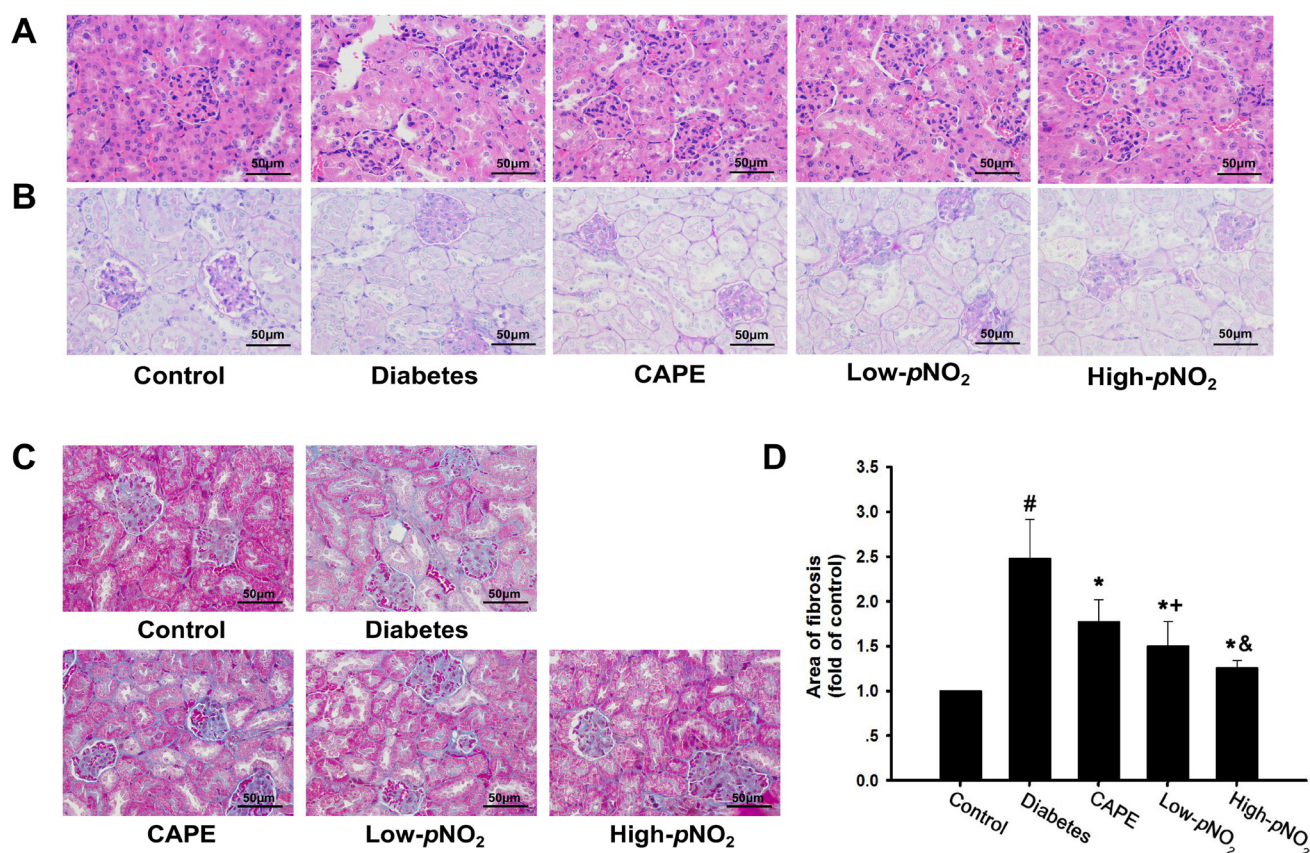

**Figure 3: Effects of CAPE and CAPE- $pNO_2$  treatment on the kidney structure and fibrosis in diabetic mice.** (A, B) Paraffin-embedded kidney tissue stained with H&E and PAS staining were observed under light microscope (400x, bar = 50  $\mu$ m). (C, D) Paraffin-embedded kidney tissue was stained with Masson staining, the blue area represents the fibrosis in kidney tissue (400x, bar = 50  $\mu$ m). Data are expressed as mean  $\pm$  SD,  $n \geq 6$ . # $p < 0.05$  vs. control group; \* $p < 0.05$  vs. diabetes group; \*\* $p < 0.05$  vs. CAPE group; & $p < 0.05$  vs. Low- $pNO_2$  group. Diabetes: the STZ-induced diabetic mice; CAPE: the STZ-induced diabetic mice treated with CAPE (20  $\mu$ mol/kg/day); Low- $pNO_2$ : the STZ-induced diabetic mice treated with CAPE- $pNO_2$  (20  $\mu$ mol/kg/day); High- $pNO_2$ : the STZ-induced diabetic mice treated with CAPE- $pNO_2$  (40  $\mu$ mol/kg/day).

dependent manner, and CAPE-*p*NO<sub>2</sub> was more effective than CAPE as shown in Figure 8C and 8D.

### CAPE and CAPE-*p*NO<sub>2</sub> arrested HG-induced cell cycle progression

Under conditions of hyperglycemia, the proportion of cells in the G0/G1 phase decreased from 62.2% to 50.1% compared with the control group. However, treatment with 20 μM CAPE and CAPE-*p*NO<sub>2</sub> increased the proportion of cells in the G0/G1 phase to 56.5% and 62.3%, and the proportion of cells in the G2/M phase was barely altered. The results proved that the cell cycle from the G1 to S phase was interrupted by CAPE and CAPE-*p*NO<sub>2</sub> treatment (Figure 9A, 9B).

Furthermore, we examined cell cycle-related proteins. As shown in Figure 9C–9G, HG significantly decreased the expression levels of p21<sup>Cip1</sup> and p27<sup>Kip1</sup> (*p* < 0.05) and increased the expression levels of cyclin E and Cdk2 (*p* < 0.05). However, CAPE and CAPE-

*p*NO<sub>2</sub> treatment up-regulated 1.3-, 1.5-fold in p21<sup>Cip1</sup> and 1.3-, 1.6-fold in p27<sup>Kip1</sup> expression (*p* < 0.05) but down-regulated 0.8-, 0.4-fold in Cdk2 and 0.5-, 0.4-fold in cyclin E expression (*p* < 0.05) in HG-induced GMCs at 20 μM. In addition, the effects of these compounds occurred in a concentration-dependent manner. These results suggest that CAPE and CAPE-*p*NO<sub>2</sub> can suppress HG-induced cell cycle progression through inhibiting cell cycle-related proteins, and CAPE-*p*NO<sub>2</sub> was much more effective than CAPE (*p* < 0.05).

### Effects of CAPE and CAPE-*p*NO<sub>2</sub> treatment on oxidative stress and ECM expression in HG-induced GMCs

The effects of CAPE and CAPE-*p*NO<sub>2</sub> on oxidative stress *in vitro* are shown in Figure 10A and 10B. There was a significant increase in intracellular ROS generation in HG-induced GMCs (*p* < 0.05), and treatment with CAPE and CAPE-*p*NO<sub>2</sub> decreased the ROS levels

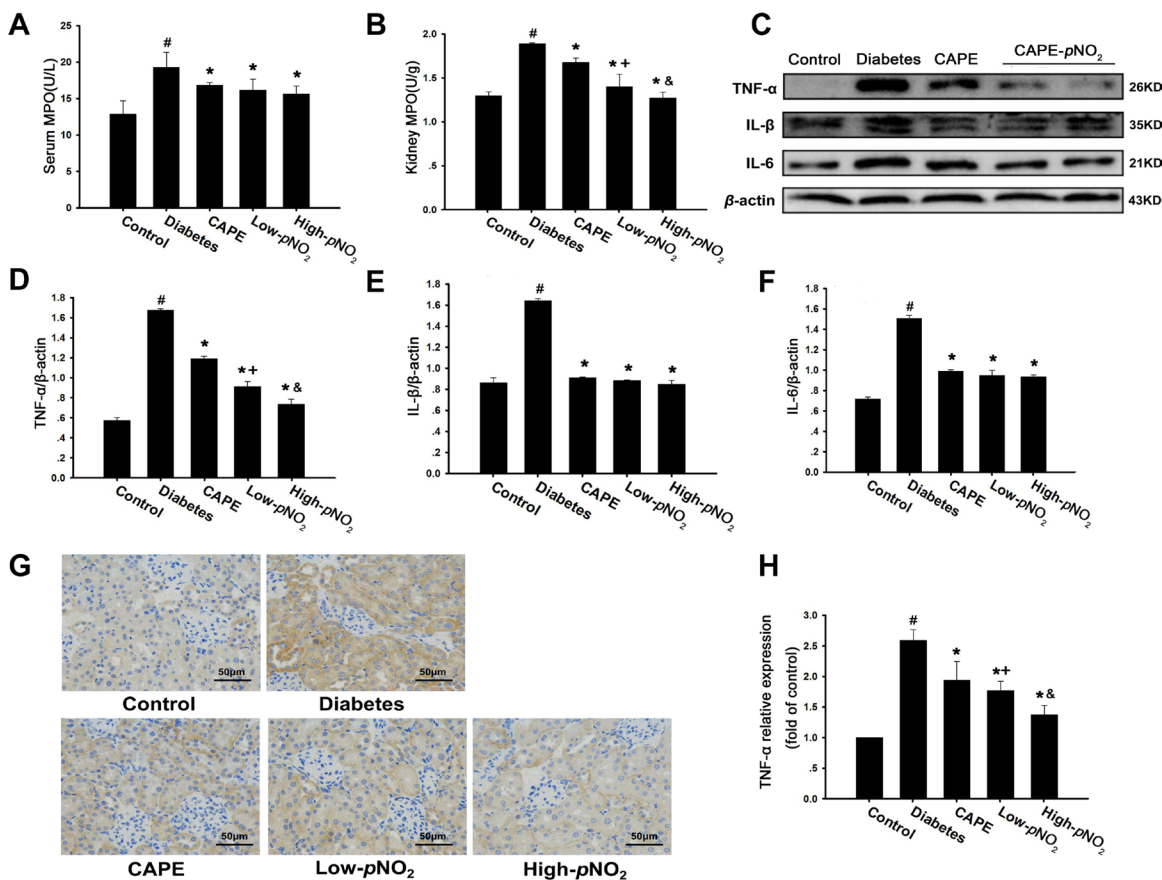

**Figure 4: CAPE and CAPE-*p*NO<sub>2</sub> inhibited inflammatory cytokines expression in diabetic mice.** (A, B) CAPE and CAPE-*p*NO<sub>2</sub> treatment on MPO level in serum and kidney tissue. (C–F) The expressions of IL-6, tumor necrosis factor α (TNF-α) and interleukin-1β (IL-1β) were assessed by western blot analysis. (G, H) the immunohistochemical analysis of tumor necrosis factor α (TNF-α) activity in kidney sections. Data are expressed as mean ± SD, *n* ≥ 6. <sup>#</sup>*p* < 0.05 vs. control group; <sup>\*</sup>*p* < 0.05 vs. diabetes group; <sup>\*</sup>*p* < 0.05 vs. CAPE group; <sup>&</sup>*p* < 0.05 vs. Low-*p*NO<sub>2</sub> group. Diabetes: the STZ-induced diabetic mice; CAPE: the STZ-induced diabetic mice treated with CAPE (20 μmol/kg/day); Low-*p*NO<sub>2</sub>: the STZ-induced diabetic mice treated with CAPE-*p*NO<sub>2</sub> (20 μmol/kg/day); High-*p*NO<sub>2</sub>: the STZ-induced diabetic mice treated with CAPE-*p*NO<sub>2</sub> (40 μmol/kg/day).

( $p < 0.05$ ). Moreover, as shown in Figure 10C and 10D, the activity of SOD was increased, and the MDA levels were decreased after treatment with CAPE and CAPE- $pNO_2$  ( $p < 0.05$ ). Furthermore, the expression of NOX4 was suppressed 0.6-, 0.4-fold by CAPE and CAPE- $pNO_2$  treatment at 20  $\mu M$  compared with HG-induced GMCs ( $p < 0.05$ ) as shown in Figure 10E and 10G. These results indicate that CAPE and CAPE- $pNO_2$  attenuated oxidative stress, and the effects of CAPE- $pNO_2$  were better than those of CAPE ( $p < 0.05$ ).

In addition, the expression levels of fibronectin and collagen IV in GMCs were markedly increased under conditions of hyperglycemia ( $p < 0.05$ ) (Figure 10F, 10H and 10I). Treatment with CAPE and CAPE- $pNO_2$  decreased 0.8- and 0.6-fold in fibronectin and 0.6- and 0.5-fold in collagen IV at 20  $\mu M$  compared to the HG-induced group ( $p < 0.05$ ); these results were similar to those of the animal experiment and showed that CAPE- $pNO_2$  had

better effects than CAPE ( $p < 0.05$ ), and occurred in a concentration-dependent manner.

### CAPE and CAPE- $pNO_2$ treatment suppressed TGF- $\beta 1$ expression via the NF- $\kappa B$ pathway in HG-induced GMCs

As shown in Figure 11A–11E, HG treatment for 24 h markedly increased cytoplasm p65 levels, as well as p-I $\kappa B\alpha$  and TGF- $\beta 1$  levels, and decreased nuclear p65 expression levels ( $p < 0.05$ ). However, CAPE and CAPE- $pNO_2$  significantly increased 1.4- and 1.5-fold in cytoplasm p65 expression and decreased 0.8- and 0.7-fold in nuclear p65; as well as p-I $\kappa B\alpha$  was 0.7- and 0.7-fold and TGF- $\beta 1$  was 0.6- and 0.3-fold at 20  $\mu M$ , compared with the HG-induced GMCs, which had similar effects to those of caused by 100  $\mu M$  PDTC treatment. CAPE- $pNO_2$  had better effects than CAPE on p65 and TGF- $\beta 1$

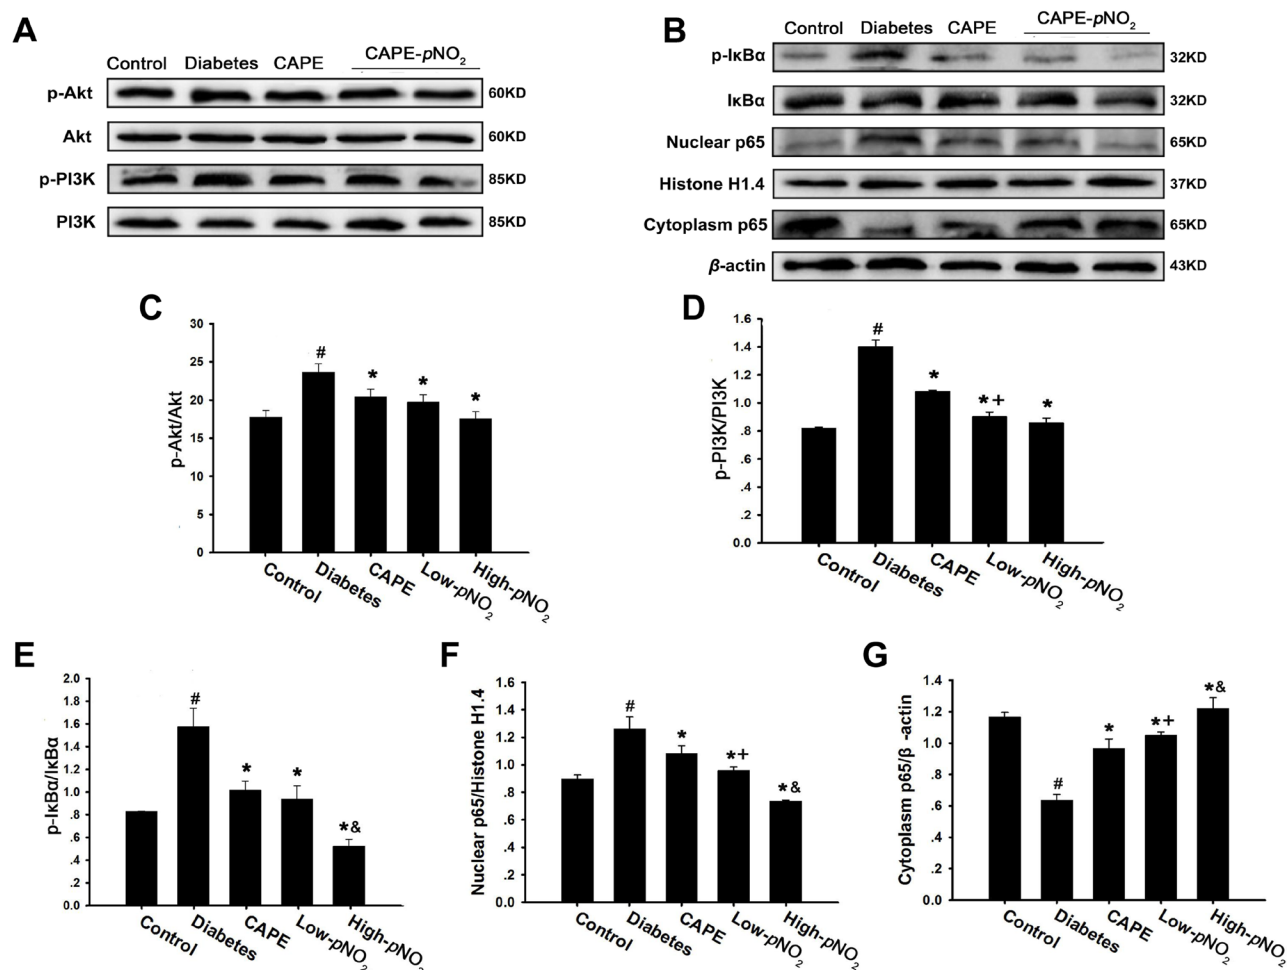

**Figure 5: CAPE and CAPE- $pNO_2$  inhibited inflammation through the Akt/NF- $\kappa B$  pathway in diabetic mice. (A–G)** The expressions of PI3K, p-PI3K, Akt, p-Akt, p-I $\kappa B\alpha$ , I $\kappa B\alpha$  and p65 in nuclear and cytoplasm were assessed by western blot. Data are expressed as mean  $\pm$  SD,  $n \geq 6$ . <sup>#</sup> $p < 0.05$  vs. control group; <sup>\*</sup> $p < 0.05$  vs. diabetes group; <sup>+</sup> $p < 0.05$  vs. CAPE group; <sup>&</sup> $p < 0.05$  vs. Low- $pNO_2$  group. Diabetes: the STZ-induced diabetic mice; CAPE: the STZ-induced diabetic mice treated with CAPE (20  $\mu mol/kg/day$ ); Low- $pNO_2$ : the STZ-induced diabetic mice treated with CAPE- $pNO_2$  (20  $\mu mol/kg/day$ ); High- $pNO_2$ : the STZ-induced diabetic mice treated with CAPE- $pNO_2$  (40  $\mu mol/kg/day$ ).

expression, but there were no differences in the effects on p-IkBa expression.

### Effects of CAPE and CAPE-*p*NO<sub>2</sub> treatment on iNOS expression in HG-induced GMCs

The effects of CAPE-*p*NO<sub>2</sub> on the iNOS expression in GMCs were similar to those in kidney tissues. As shown in Figure 12A–12C, iNOS expression in GMCs in the HG-induced group was decreased ( $p < 0.05$ ). Treatment with PDTC up-regulated iNOS expression, and CAPE and CAPE-*p*NO<sub>2</sub> had similar effects, which increased 1.4- and 2.7-fold in iNOS expression at 20  $\mu$ M. CAPE-*p*NO<sub>2</sub> had better effects than CAPE ( $p < 0.05$ ), and these effects occurred in a positive concentration-dependent manner.

## DISCUSSION

Diabetes mellitus is one of the most widespread metabolic diseases in the world; chronic hyperglycemia in

diabetes leads to dysfunction in various tissues, especially in the eyes, kidneys, heart, blood vessels and nerves [44]. DN is the most important complication of diabetes, and it greatly affects patient quality of life. In recent years, therapeutic strategies for DN are mainly focused on controlling blood pressure and blood glucose levels, diet therapy and organ transplants, but these strategies do not stop the development of kidney disease and are expensive. It has been reported that CAPE and caffeic acid phenylethyl amide exhibit significant potential as anti-diabetic and liver-protective agents in STZ-induced diabetic rats; these compounds could protect the renal system from ischemia-reperfusion injury via anti-fibrotic mechanisms [40, 45]. CAPE-*p*NO<sub>2</sub>, a derivative of CAPE, was synthesized and demonstrated better effects than CAPE on acute myocardial ischemia-reperfusion injury through anti-oxidative stress, anti-inflammatory and anti-apoptotic activities in rats in our previous research [40].

In the present experiment, CAPE-*p*NO<sub>2</sub> significantly increased body weights and decrease FBG levels in STZ-

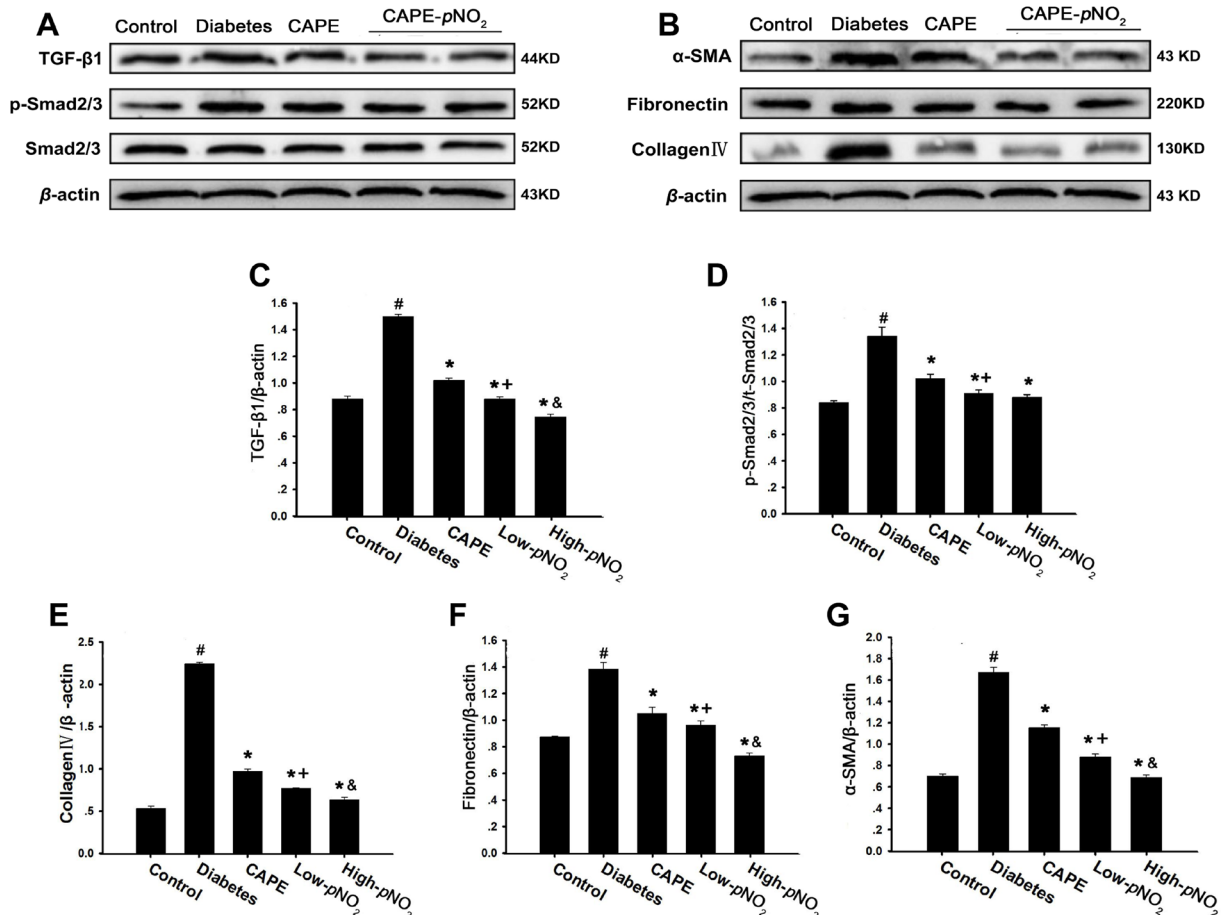

**Figure 6: CAPE and CAPE-*p*NO<sub>2</sub> prevented renal fibrosis through the TGF-β/Smad pathway in diabetic mice. (A–G)** The expressions of TGF-β1, collagenIV, fibronectin, α-SMA, p-Smad2/3 and Smad2/3 were assessed by western blot analysis. Data are expressed as mean ± SD,  $n \geq 6$ . <sup>#</sup> $p < 0.05$  vs. control group; <sup>\*</sup> $p < 0.05$  vs. diabetes group; <sup>+</sup> $p < 0.05$  vs. CAPE group; <sup>&</sup> $p < 0.05$  vs. Low-*p*NO<sub>2</sub> group. Diabetes: the STZ-induced diabetic mice; CAPE: the STZ-induced diabetic mice treated with CAPE (20  $\mu$ mol/kg/day); Low-*p*NO<sub>2</sub>: the STZ-induced diabetic mice treated with CAPE-*p*NO<sub>2</sub> (20  $\mu$ mol/kg/day); High-*p*NO<sub>2</sub>: the STZ-induced diabetic mice treated with CAPE-*p*NO<sub>2</sub> (40  $\mu$ mol/kg/day).



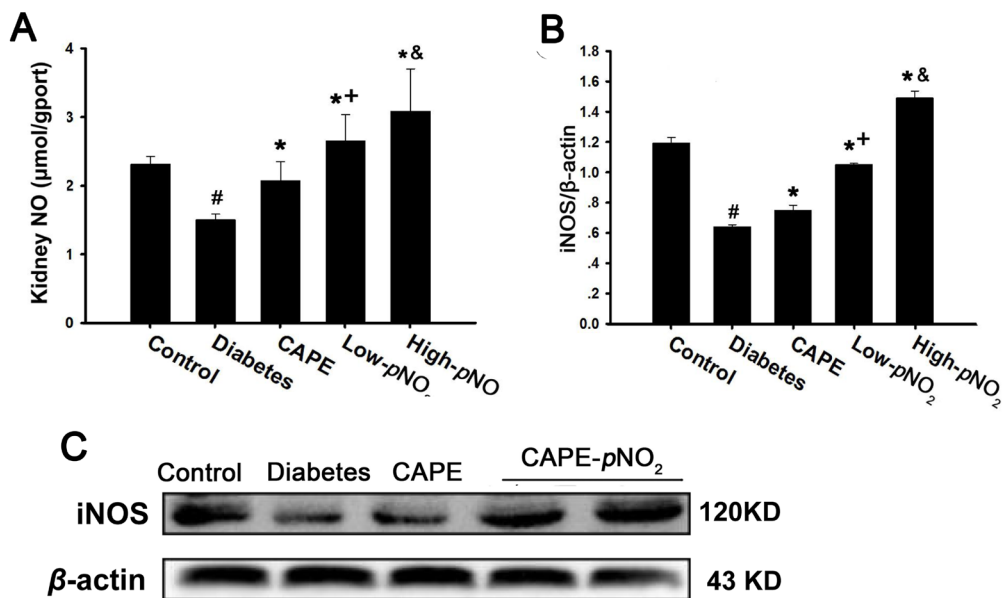

**Figure 7: CAPE and CAPE-pNO<sub>2</sub> increased NO content via regulating iNOS expression in diabetic mice.** (A) the NO level; (B, C) the iNOS protein expression by CAPE and CAPE-pNO<sub>2</sub> treatment. Data are expressed as mean ± SD,  $n \geq 6$ . # $p < 0.05$  vs. control group; \* $p < 0.05$  vs. diabetes group; + $p < 0.05$  vs. CAPE group; & $p < 0.05$  vs. Low-pNO<sub>2</sub> group. Diabetes: the STZ-induced diabetic mice; CAPE: the STZ-induced diabetic mice treated with CAPE (20 µmol/kg/day); Low-pNO<sub>2</sub>: the STZ-induced diabetic mice treated with CAPE-pNO<sub>2</sub> (20 µmol/kg/day); High-pNO<sub>2</sub>: the STZ-induced diabetic mice treated with CAPE-pNO<sub>2</sub> (40 µmol/kg/day).

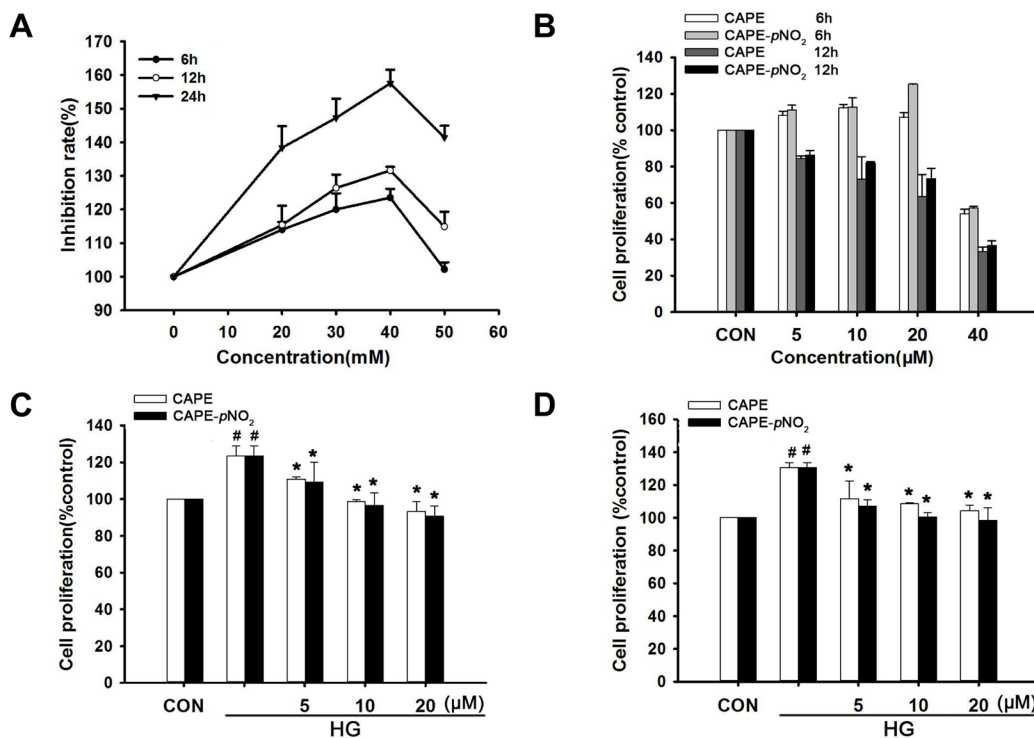

**Figure 8: CAPE and CAPE-pNO<sub>2</sub> suppressed HG-induced GMC proliferation.** (A) Glomerular mesangial cells (GMCs) were induced by various concentration D-glucose from 6 h to 24 h. (B) GMCs were treated with CAPE and CAPE-pNO<sub>2</sub> at the concentration of 5, 10, 20, 40 µM from 6h to 12 h in normal D-glucose. (C, D) GMCs were treated with CAPE and CAPE-pNO<sub>2</sub> at the concentration of 5, 10, 20, µM in 30 mM D-glucose for 3 h and 6 h. Data are expressed as mean ± SD,  $n = 3$  per group. # $p < 0.05$  vs CON group; \* $p < 0.05$  vs HG group. + $p < 0.05$  vs CAPE group. CON group: GMCs kept in DMEM/F12 with 5.6 mM D-glucose. HG group: GMCs kept in DMEM/F12 with 30 mM D-glucose. CAPE and CAPE-pNO<sub>2</sub> group: treated with 5, 10, 20 µM after induced by 30 mM D-glucose, respectively.

induced diabetic mice; it also reversed the changes in biochemical indexes, such as 24-h Alb, sCr, BUN, TG and TC levels, which reflect the function of the kidneys [46]. These results imply that CAPE-*pNO*<sub>2</sub> can ameliorate the symptoms of diabetes mellitus and DN and improve renal function in STZ-induced diabetic mice. In addition, in the *in vitro* assay with GMCs, CAPE-*pNO*<sub>2</sub> inhibited proliferation in HG-induced GMCs, arrested HG-induced cell cycle progression, suppressed ROS generation, and also significantly decreased NOX4 and ECM protein expression.

GMCs maintain the organizational structure and physiological functions of the kidney, and abnormal GMC

proliferation plays an important role in the development of DN [47]. It has been reported that p21<sup>Cip1</sup>, p27<sup>Kip1</sup>, Cdk2 and cyclin E are involved in the G1-S phases of the cell cycle and that Cdk2 combine with cyclin E to promote the cell cycle, which contributes to proliferation, differentiation and aging in cells; in addition, high glucose conditions down-regulate p21<sup>Cip1</sup> and p27<sup>Kip1</sup> expression in GMCs [47–51]. Our data indicate that CAPE and CAPE-*pNO*<sub>2</sub> can reverse HG-induced cell cycle-related proteins to arrest the cell cycle at G1-S, which could cause the suppression of HG-induced GMC proliferation and ECM accumulation.

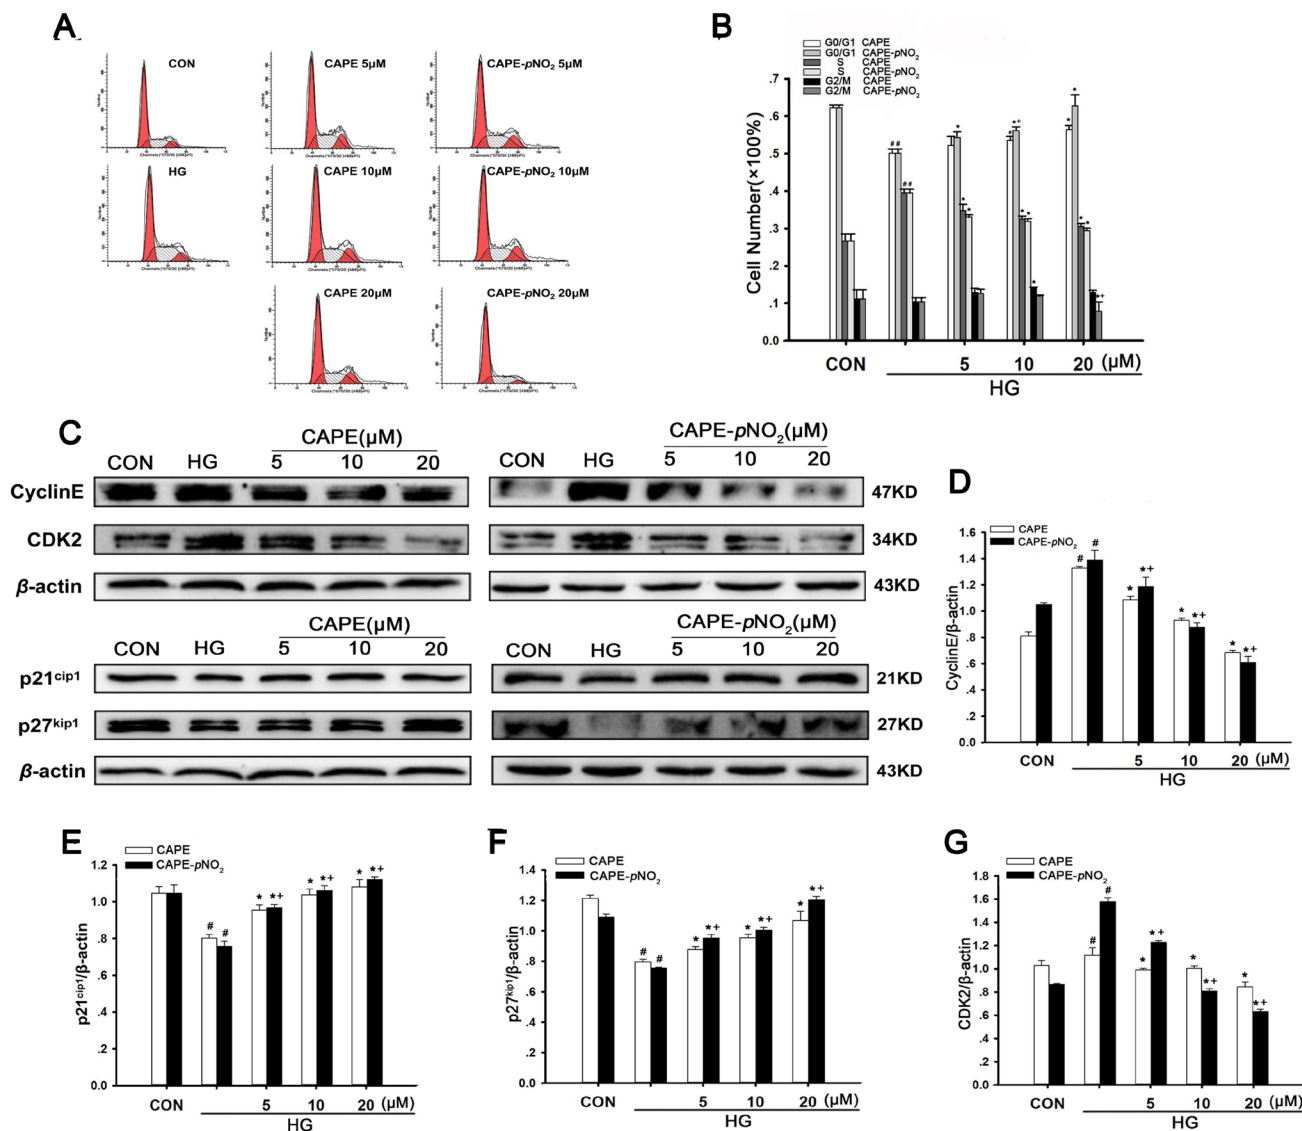

**Figure 9: CAPE and CAPE-*pNO*<sub>2</sub> arrested HG-induced cell cycle progression.** (A, B) Change of cell cycle distribution induced by CAPE and CAPE-*pNO*<sub>2</sub> was investigated by flow cytometry and the percentage of cell in G0/G1, S and G2/M phase was calculated by a Multicycle software. (C–G) The expressions of CDK2, CyclinE, p21<sup>Cip1</sup> and p27<sup>Kip1</sup> were assessed by western blot analysis. Data are expressed as mean ± SD, *n* = 3 per group. #*p* < 0.05 vs CON group; \**p* < 0.05 vs HG group. †*p* < 0.05 vs CAPE group. CON group: GMCs kept in DMEM/F12 with 5.6 mM D-glucose. HG group: GMCs kept in DMEM/F12 with 30 mM D-glucose. CAPE and CAPE-*pNO*<sub>2</sub> group: treated with 5, 10, 20 μM after induced by 30 mM D-glucose, respectively.

It is well known that imbalances in the oxidative stress defense system could damage the kidney. In this system, SOD is an enzyme that scavenges reactive oxygen radicals and converts harmful super oxygen radicals into hydrogen peroxide to protect against

kidney damage from free radicals, whereas MDA is a degradation product of oxygen-derived free radicals and lipid oxidation that causes cytotoxicity. The interaction of oxidative stress generation with biomolecules, such as lipids, proteins and DNA, can activate a series of

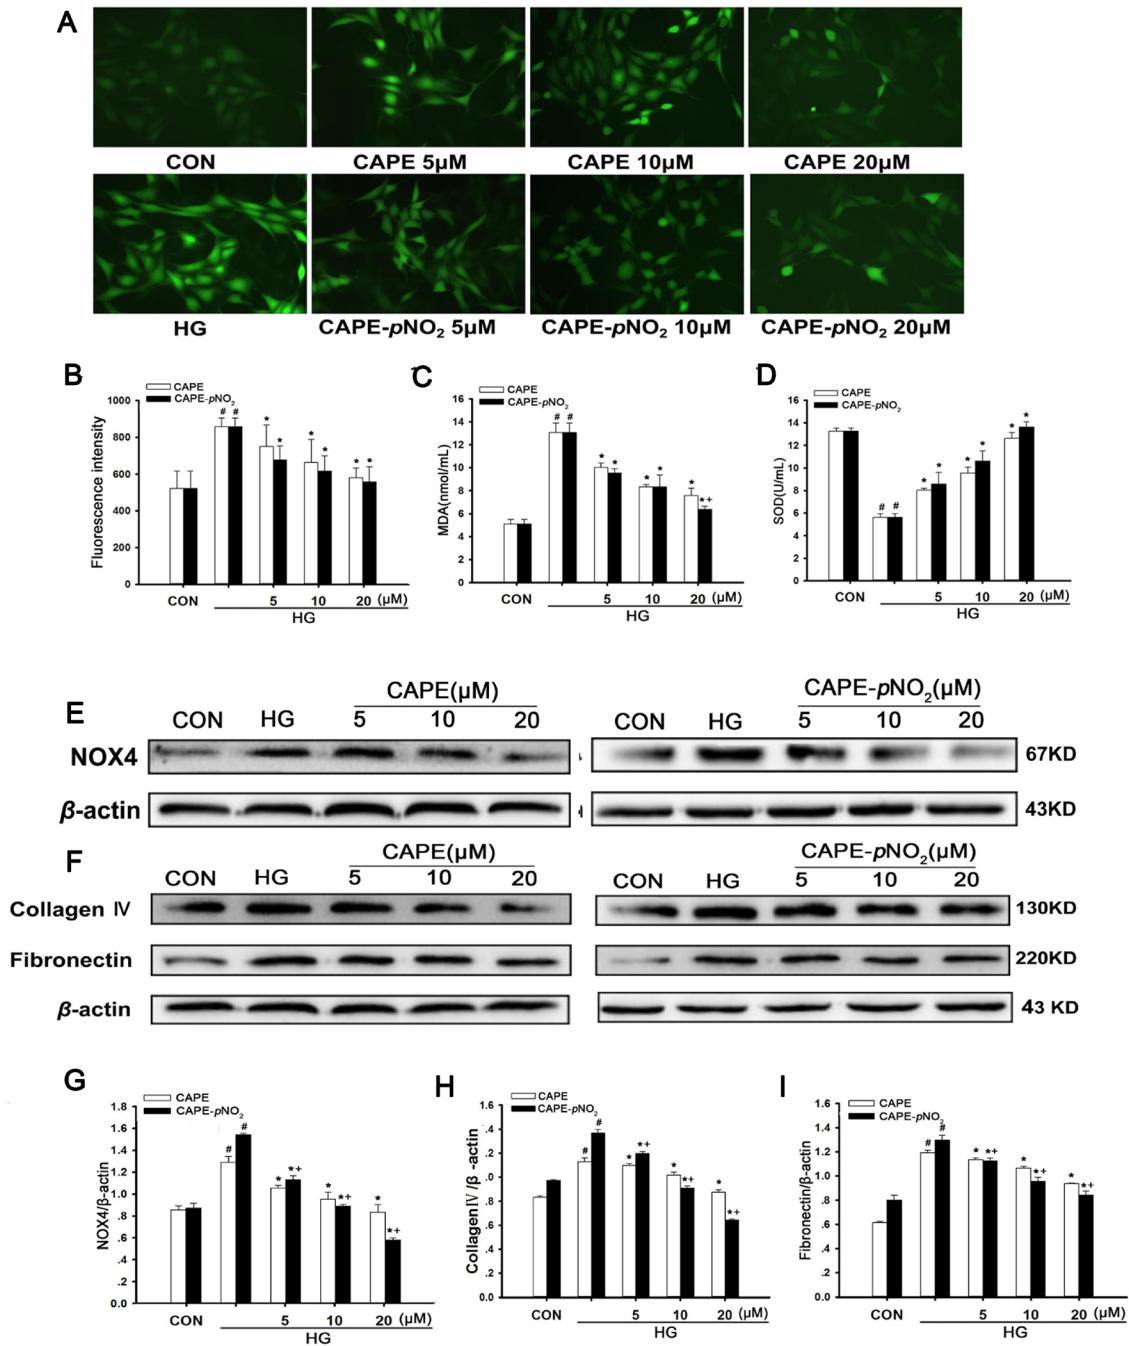

**Figure 10: Effects of CAPE and CAPE-pNO<sub>2</sub> treatment on oxidative stress and ECM expression in HG-induced GMCs.** (A, B) the intracellular ROS level in GMCs was detected by 2',7'-dichlorodi-hydrofluorescein diacetate (DCFH-DA) and observed by a fluorescence microscope or a fluorospectrophotometer at excitation/emission maxima of 485/525 nm. (C, D) the intracellular MDA and SOD levels in GMCs. (E, G) the expression of NOX4 was assessed by western blot analysis. (F, H, I) The expressions of collagen IV and fibronectin were assessed by western blot analysis. Data are expressed as mean ± SD, n = 3 per group. <sup>#</sup>p < 0.05 vs CON group; <sup>\*</sup>p < 0.05 vs HG group. <sup>\*</sup>p < 0.05 vs CAPE group. CON group: GMCs kept in DMEM/F12 with 5.6 mM D-glucose. HG group: GMCs kept in DMEM/F12 with 30 mM D-glucose. CAPE and CAPE-pNO<sub>2</sub> group: treated with 5, 10, 20 μM after induced by 30 mM D-glucose, respectively.

cell signaling pathways, leading to severe injury and dysfunction in the kidney. In addition, under long-term hyperglycemia conditions, the balance of anti-oxidative/oxidative stress is destroyed and ROS are over produced [52–54]. NADPH oxidation is a major source of ROS production, and the NADPH oxidase 4 (NOX4) is the major active subgroup of NADPH oxidase, and high levels of ROS was important in the progression of diabetic nephropathy [27, 55–59]. In anti-oxidative

stress, CAPE and CAPE-*p*NO<sub>2</sub> dramatically attenuated MDA levels and increased SOD activity in STZ-induced diabetic mice and HG-induced GMCs. In addition, ROS generation was decreased by CAPE and CAPE-*p*NO<sub>2</sub> treatment in HG-induced GMCs. Our results show that CAPE-*p*NO<sub>2</sub> can maintain balance between the oxidative stress defense systems in diabetic mice and HG-induced GMCs and that CAPE-*p*NO<sub>2</sub> has better effects on anti-oxidative stress *in vivo* and *in vitro*.

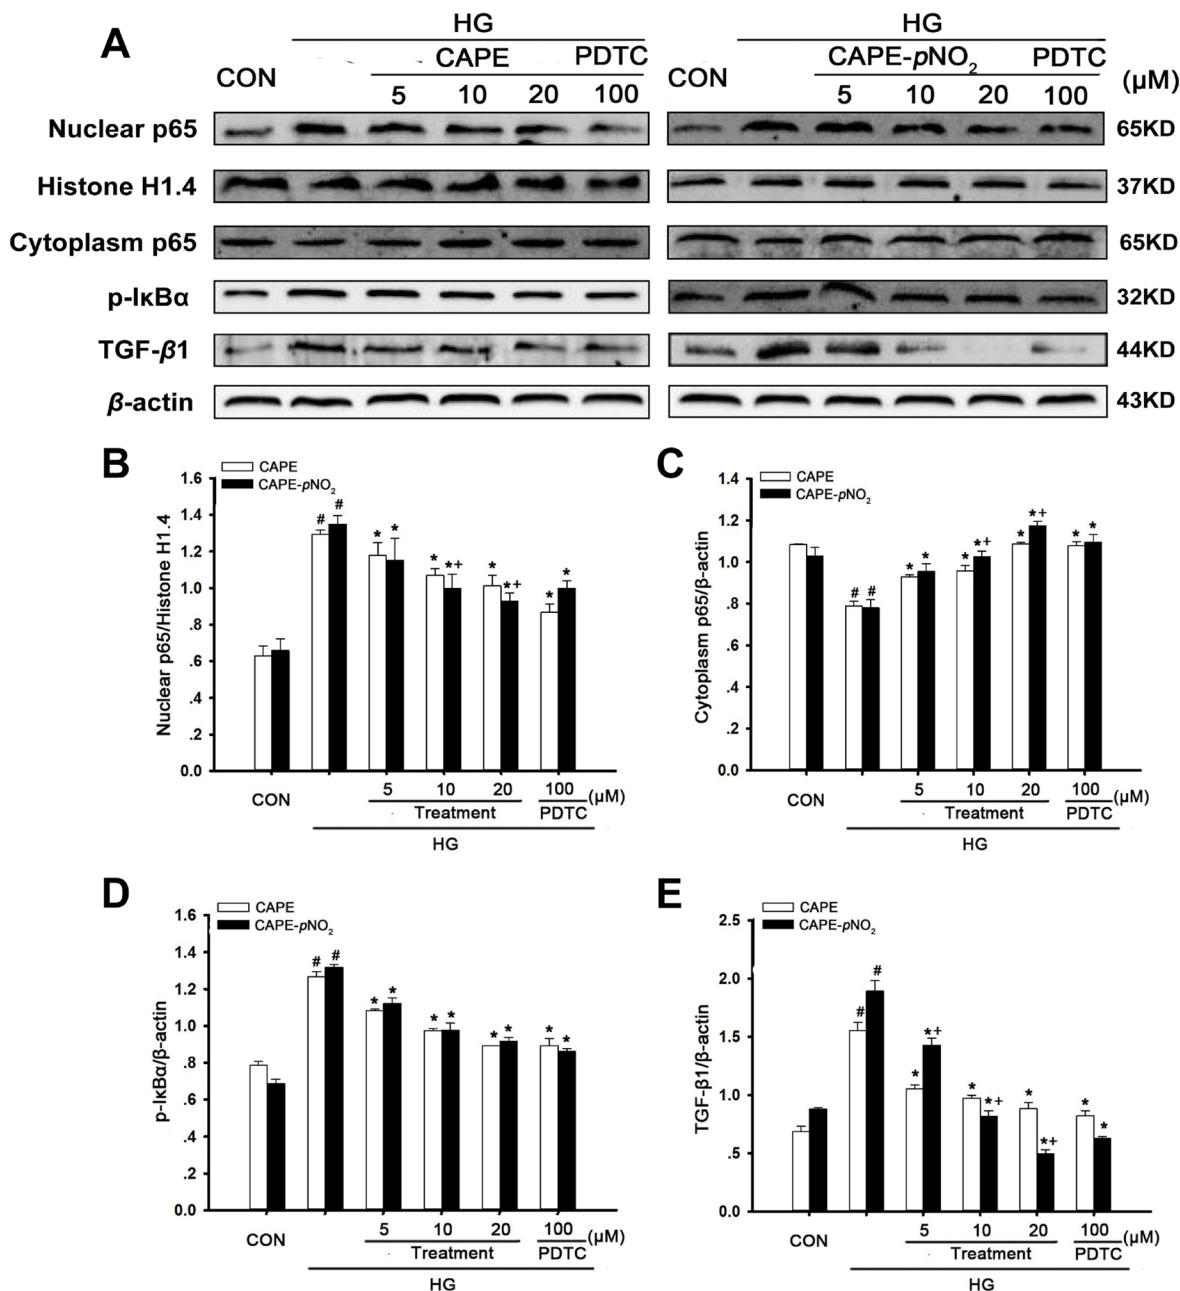

**Figure 11: CAPE and CAPE-*p*NO<sub>2</sub> treatment suppressed TGF-β1 expression via the NF-κB pathway in HG-induced GMCs.** (A–E) the expressions of p65 in nuclear and cytoplasm, p-IκBα, TGF-β1 were assessed by western blot analysis. Data are expressed as mean ± SD, *n* = 3 per group. #*p* < 0.05 vs CON group; \**p* < 0.05 vs HG group. +*p* < 0.05 vs CAPE group. CON group: GMCs kept in DMEM/F12 with 5.6 mM D-glucose. HG group: GMCs kept in DMEM/F12 with 30 mM D-glucose. CAPE and CAPE-*p*NO<sub>2</sub> group: treated with 5, 10, 20 μM after induced by 30 mM D-glucose, respectively. PDTC group: treated with 100 μM after induced by 30 mM D-glucose.

Imbalance in the oxidative stress defense systems could regulate sensitive cytokines. ROS promotes NF- $\kappa$ B transcription through activating I $\kappa$ B $\alpha$  kinase, and the p65 subunit is transferred into the nucleus and binds to the specific promoter sequence of target genes, such as TNF- $\alpha$ , IL-1 $\beta$ , and IL-6, which results in inflammatory injury in the kidneys. Moreover, Akt is an upstream element of the NF- $\kappa$ B pathway that can mediate the development of inflammatory diseases and promote the transcription of NF- $\kappa$ B [3, 60, 61]. In our experiment, we showed that CAPE and CAPE-*p*NO<sub>2</sub> inhibit the Akt/NF- $\kappa$ B pathway to regulate the release of inflammatory cytokines in diabetic mice (Figure 13).

Activated NF- $\kappa$ B that translocates into the nucleus can also induce the expression of TGF- $\beta$ 1, which is a key fibrotic cytokine, and mediate ECM accumulation via the TGF- $\beta$ 1/Smad pathway [55, 62–64]. The TGF- $\beta$ 1 promoter has been confirmed to contain a sequence located at 715 to 707 bp (AGGGACTT) where NF- $\kappa$ B binds to target TGF- $\beta$ 1 gene expression [65]. In addition, the Smad family is a classic downstream signal transduction molecule of TGF- $\beta$ 1, and the activated phosphorylation of Smad2 and Smad3 could promote the deposition of ECM proteins, which comprise collagen, elastin, laminin and fibronectin and are secreted mainly from GMCs [66, 67]. They contribute to renal fibrosis and have been recognized as part of the major pathogenic events in the progression of renal failure in DN [62, 68, 69]. Hence, the overexpression of TGF- $\beta$ 1 may be the main cause of glomerulosclerosis and tubulointerstitial fibrosis, and the inhibition of TGF- $\beta$ 1 could be beneficial for treating DN. *In vivo* experiments using HE and Masson staining showed that CAPE and CAPE-*p*NO<sub>2</sub> prevented kidney fibrosis, which may be associated with the suppression of the TGF- $\beta$ 1/

Smad pathway. *In vitro* experiments in which the NF- $\kappa$ B inhibitor PDTC was incubated with HG-induced GMCs were used to validate the relationship between NF- $\kappa$ B and ECM proteins. PDTC promoted p65 subunit transfer into the nucleus and binding to the specific promoter sequences of target genes. Our results showed the 100  $\mu$ M PDTC suppressed the transcription of p65. CAPE and CAPE-*p*NO<sub>2</sub> showed effects similar to PDTC, and CAPE-*p*NO<sub>2</sub> was more efficient than CAPE. Therefore, CAPE and CAPE-*p*NO<sub>2</sub> reduced ECM accumulation via regulating the TGF- $\beta$ 1, and the TGF- $\beta$ 1 expression was associated with the NF- $\kappa$ B pathway *in vitro* (Figure 13).

More importantly, NO is decreased in CKD; this contributes to cardiovascular events and further causes the progression of kidney damage [70, 20]. iNOS drives the production of NO, which affects many features *in vivo* and *in vitro*. For DN, we can infer that a relationship between NO and DN must exist. Moreover, it has been reported that TGF- $\beta$ 1 can suppress iNOS mRNA expression induced by LPS, IFN- $\gamma$ , IL1- $\beta$ , and various cytokines and can promote iNOS protein degradation via the ubiquitin-proteasome pathway. These data indicate that TGF- $\beta$ 1 control of the NO content produced by iNOS in pathological conditions is critical [71, 72]. Our results show that CAPE and CAPE-*p*NO<sub>2</sub> can increase NO content via regulating iNOS expression in diabetic mice and up-regulating iNOS expression in HG-induced GMCs. It can be inferred that iNOS may have a direct relationship with TGF- $\beta$ 1 and an indirection relationship with the NF- $\kappa$ B pathway (Figure 13); these may be key points that are worth exploring in DN.

In one word, CAPE-*p*NO<sub>2</sub> possessed better activities in regulating of the Akt/NF- $\kappa$ B/ iNOS pathway in STZ-induced diabetic mice. CAPE-*p*NO<sub>2</sub> is a nitro derivative

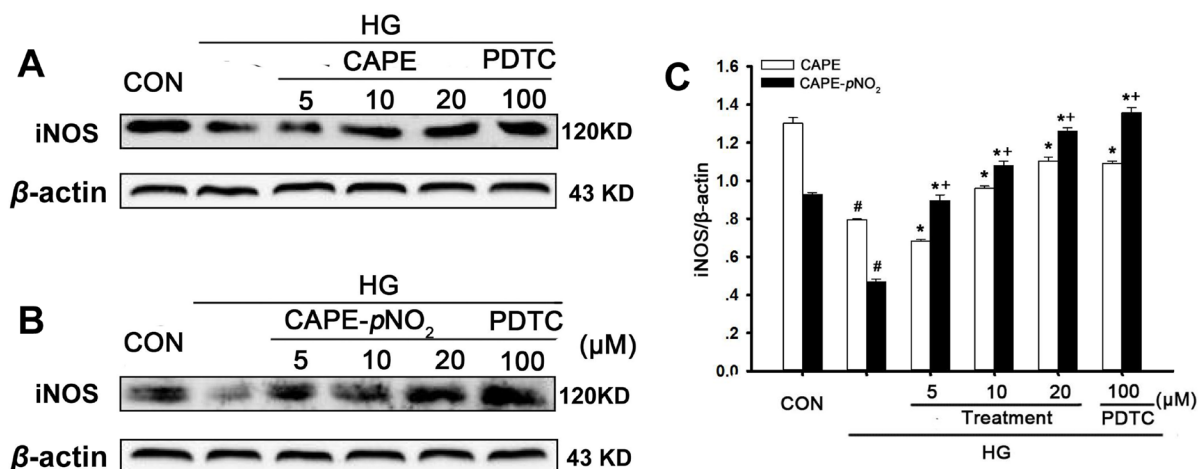

**Figure 12: Effects of CAPE and CAPE-*p*NO<sub>2</sub> treatment on iNOS expression in HG-induced GMCs.** (A–C) the expression of iNOS protein was assessed by western blot analysis. Data are expressed as mean  $\pm$  SD,  $n = 3$  per group. # $p < 0.05$  vs CON group; \* $p < 0.05$  vs HG group. \* $p < 0.05$  vs CAPE group. CON group: GMCs kept in DMEM/F12 with 5.6 mM D-glucose. HG group: GMCs kept in DMEM/F12 with 30 mM D-glucose. CAPE and CAPE-*p*NO<sub>2</sub> group: treated with 5, 10, 20  $\mu$ M after induced by 30 mM D-glucose, respectively. PDTC group: treated with 100  $\mu$ M after induced by 30 mM D-glucose.

of CAPE, the reason of its stronger pharmacological activities may be nitro replacement changing its molecular properties. The nitro-group is an electron withdraw group, it could reduce the cloud density of benzene ring to change the bioactivities of CAPE- $pNO_2$  probably [73], and this change is needs to be further verified.

## CONCLUSIONS

In summary, our data suggest that CAPE and CAPE- $pNO_2$  can ameliorate DN by suppressing renal oxidative stress, inflammation and fibrosis in STZ-induced diabetic mice via the Akt/ NF- $\kappa$ B/ iNOS pathway; additionally, these compounds can inhibit cell proliferation and ECM accumulation via regulating TGF- $\beta$ 1 expression in HG-induced GMCs. Furthermore, CAPE- $pNO_2$  had stronger effects than CAPE. Our data imply that CAPE- $pNO_2$  has kidney- protective effects against DN and can serve as a potential drug for treating DN. However, these possibilities still needed to be explored.

## MATERIALS AND METHODS

### Materials

CAPE and CAPE- $pNO_2$  were synthesized as previously described in the literature [40] (purity >99.0%). Glomerular mesangial cells (GMCs) were purchased from the Cell Bank of the Chinese Academy of Sciences (Shanghai, China). STZ, trypsin, penicillin, streptomycin, dimethyl sulfoxide (DMSO), bovine serum albumin (BSA), 3-[4,5-dimethyl-2-thiazolyl] -2,5-diphenyl-2-

tetrazolium bromide (MTT) and propidium iodide (PI) were purchased from Sigma Chemicals (St. Louis, MO, USA). A glucometer and blood glucose test strips were purchased from Sannuo (Guangxi, China). Blood urea nitrogen (BUN), serum creatinine (sCr), urine protein (UR), total cholesterol (TC), total triglyceride (TG), malondialdehyde (MDA), myeloperoxidase (MPO), nitric oxide (NO) and superoxide dismutase (SOD) assay kits were purchased from Nanjing Jiancheng Bioengineering Institute (Nanjing, China). Dulbecco's modified Eagle's medium (DMEM), F12 and fetal bovine serum (FBS) were purchased from Gibco/Invitrogen (Carlsbad, CA, USA). RNase A was acquired from Promega (Madison, WI). 2',7'-dichlorofluorescein- diacetate (DCFH-DA), PDTC and Nuclear and Cytoplasmic Protein Extraction Kit were purchased from Beyotime Biotechnology (Shanghai, China). Antibodies against Akt, PI3K, p65, TGF- $\beta$ 1,  $\alpha$ -SMA, Smad2/3, TNF- $\alpha$ , fibronectin, collagen IV, IL-6, IL- $\beta$ , I $\kappa$ B $\alpha$ , CDK2, cyclin E, p21<sup>Cip1</sup>, p27<sup>Kip1</sup>, iNOS, p-Akt, p-PI3K, p-Smad2/3 and p-I $\kappa$ B $\alpha$ , histone H1.4 and  $\beta$ -actin and horseradish peroxidase (HRP)-conjugated goat anti-rabbit secondary antibody were purchased from Proteintech Group Inc (Wuhan, China).

### Animals and treatment

Eight-week-old Kunming male mice (18–22 g) were purchased from the Experimental Animal Center of Chongqing Medical University (Chongqing, China SCXK (YU) 2016–0002). They were housed under a 12 h light/dark cycle at 22°C with access to food and water. All animal procedures were conducted according to the

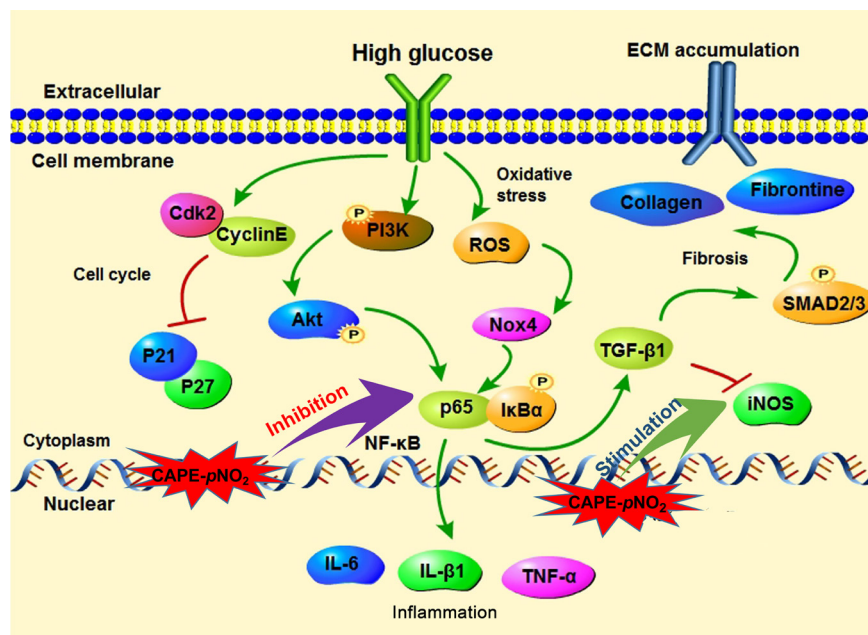

**Figure 13: The possible mechanism of CAPE and CAPE- $pNO_2$  on DN.** (A) The CAPE and CAPE- $pNO_2$  regulated the Akt/NF- $\kappa$ B/iNOS pathway to ameliorate oxidative stress, fibrosis and inflammation in diabetic mice. (B) The CAPE and CAPE- $pNO_2$  suppressed the HG-induced GMCs proliferation via arresting the cell cycle and reducing the ECM accumulation via regulating the TGF- $\beta$ 1.

China Animal Welfare Legislation and approved by the Committee for the Care and Use of Laboratory Animals at Southwest University. Fifty mice were randomly divided into two groups: control group and diabetes group. The diabetes group had 40 mice, which were intraperitoneally injected with STZ dissolved in 10 mM citrate buffer (pH 4.5) at 50 mg/kg body weight for 5 consecutive days. The control group was injected with the same volume of citrate buffer.

Blood samples were obtained from the tails of the mice, and fasting blood glucose (FBG) levels were measured with a glucometer. Mice with the FBG levels above 11.1 mmol/L were considered to diabetes; these mice were then divided randomly into four groups: 1) the diabetes group, mice treated with normal saline, 2) the CAPE group, mice treated with CAPE (20  $\mu$ mol/kg/day), 3) the low CAPE-*p*NO<sub>2</sub> group, mice treated with CAPE-*p*NO<sub>2</sub> (20  $\mu$ mol/kg/day), and 4) the high CAPE-*p*NO<sub>2</sub> group, mice treated with CAPE-*p*NO<sub>2</sub> (40  $\mu$ mol/kg/day). CAPE and CAPE-*p*NO<sub>2</sub> were dissolved in 0.01% DMSO and intraperitoneally injected for 8 weeks. FBG levels were tested once a week using tail-vein blood samples, and the mouse body weights were recorded every three days for 8 weeks. On the last day of the 8th week, the mice were housed in metabolic cages to collect urine to test 24-h albumin excretion rates. After the above experiments were finished, all mice were fasted for 12 h and then euthanized; then, the kidneys and blood samples were collected for the following experiments.

### Biochemical indexes

The kidneys were weighed to calculate the kidney-to-body weight ratio (ratio = body weight / kidney weight  $\times$  100%). The urine was centrifuged at 2000 rpm for 10 min at 4°C to isolate the supernatant. In addition, the blood samples were centrifuged at 3000 rpm for 15 min at 4°C to separate the serum. The levels of cholesterol, triglycerides, blood urea nitrogen and creatinine in the serum and 24-h albumin excretion were tested by kits according to the respective manufacturer's protocol.

### HE, PAS, Masson and immunohistochemical staining of the kidneys

The kidneys were fixed in a 4% paraformaldehyde solution for 48 h and then embedded in paraffin. The 5  $\mu$ m-thick serial sections cut from paraffin blocks were stained with HE, PAS and Masson trichrome solutions. Images of these stained sections were obtained using a light microscope.

For immunohistochemistry experiments, 5  $\mu$ m-thick sections were deparaffinized, hydrated and immersed in 10 mM citric acid (pH 6.0); next, the endogenous peroxidase activity was blocked with 3% H<sub>2</sub>O<sub>2</sub>. Then, the

kidney sections were incubated with primary antibodies (anti-TNF- $\alpha$ , 1:200) at 4 °C overnight. The next day, the kidney sections were incubated with HRP-conjugated goat anti-rabbit IgG secondary antibody for 2 h at room temperature and washed with PBS (3  $\times$  5 min). After that, the sections were stained with the diaminobenzidine (DAB) and hematoxylin. Finally, images of the sections were obtained with a light microscope, and the positive-stained areas were measured and quantified using IPP, which presented the expression levels of the corresponding protein.

### Cell culture and treatment

GMCs were grown in DMEM/F-12(3:1) supplemented with 5% FBS, 100 U/mL penicillin and 100  $\mu$ g/mL streptomycin at 37°C in a humidified incubator (5% CO<sub>2</sub>, 95% air). The cells were synchronized in serum-free medium for 24 h and then divided into the following groups: (a) control, DMEM/F-12 medium with normal D-glucose (5.6 mM), (b) high D-glucose, DMEM/F-12 medium with high D-glucose (30 mM), (c-e) high D-glucose + treatment, DMEM/F-12 medium with high D-glucose and treatment with CAPE or CAPE-*p*NO<sub>2</sub> (5, 10 or 20  $\mu$ M), (f) high D-glucose + PDTC, DMEM/F-12 medium with high D-glucose and treatment with PDTC (100  $\mu$ M).

### Cell proliferation assay

The effects of CAPE and CAPE-*p*NO<sub>2</sub> on cell proliferation were measured by MTT assay. GMCs were seeded at a density of 3  $\times$  10<sup>3</sup> cells per well in 96-well plates and incubated with normal D-glucose or high D-glucose concentrations in the presence or absence of CAPE or CAPE-*p*NO<sub>2</sub> (5, 10 or 20  $\mu$ M) for 3 h or 6 h. A total of 10  $\mu$ L of MTT (5 mg/mL) was then added to each well for another 4 h at 37°C. After incubation, 150  $\mu$ L of DMSO was added and slowly shaken until the tetrazolium dye dissolved. The amount of formazan dissolved in DMSO was measured by a plate reader (Bio Tek) at 490 nm.

### Reactive oxygen species (ROS) evaluation in GMCs

Intracellular ROS levels were measured using DCFH-DA. GMCs were seeded in 6-well plates and treated with CAPE or CAPE-*p*NO<sub>2</sub> at 5, 10 or 20  $\mu$ M for 6 h. After treatment, GMCs were washed with FBS-free culture medium three times and incubated with 10 mM DCFH-DA in the dark for 30 min at 37°C; then, the cells were washed with FBS-free culture medium, and the cells were observed under a fluorescence microscope or were measured by a fluorospectrophotometer at an excitation/emission of 485/525 nm.

## Cell cycle analysis

The cell cycle distribution was evaluated by flow cytometry. After treatment with CAPE or CAPE-*p*NO<sub>2</sub> at 5, 10 or 20 μM for 6 h, the cells were collected and fixed in 70% ice-cold ethanol at 4°C overnight. The next day, the cells were incubated with 100 μL of RNase A and 400 μL of PI at room temperature for 30 min without light. Then, a FACS Calibur flow cytometer (Becton-Dickinson) equipped with a 488-nm argon laser was used for detection, and the cell cycle distribution was analyzed by Cell Quest software and ModiFit according to the manufacturer's instructions.

## SOD, MDA, MPO and NO evaluation in mice and GMCs

Serum was separated from the blood samples. The kidneys were rinsed with 0.9% saline and homogenized at 10,000 rpm in an ice bath for 5 min to prepare 10% homogenates; the samples were subsequently centrifuged 10,000 rpm at 4°C for 10 min to collect the supernatants. After GMCs were treated with CAPE or CAPE-*p*NO<sub>2</sub> (5, 10 or 20 μM) for 6 h, the cells were washed with PBS three times and collected; then, the cells were lysed with RIPA buffer and 1 mM PMSF for 30 min, followed by centrifugation at 10,000 rpm and 4°C for 10 min to separate the supernatants.

Serum samples and the supernatants from the kidneys and GMCs were collected to determine the SOD and MDA levels. The MPO levels in the serum samples and the kidneys and the NO levels in the kidneys were determined according to the respective manufacturer's protocol.

## Western blotting assay

The kidneys were homogenized in RIPA lysis buffer and then centrifuged for 15 min at 10,000 rpm to extract the proteins. After the GMCs were treated with CAPE or CAPE-*p*NO<sub>2</sub> at 5, 10 or 20 μM for 6 h, the cells were washed three times with cold PBS, and the nuclear and cytoplasmic proteins were extracted by a commercially available assay. Then, the cells were centrifuged for 15 min at 10,000 rpm, and the cytoplasm and nuclear proteins were collected for the next experiment. The protein samples were boiled for 10 min at 95°C and resolved using SDS-PAGE. Proteins on the gel were transferred to PVDF membranes, which were soaked in methanol for 15 min. Next, 5% skim milk prepared with PBST (0.1% Tween-20 and 99.9% PBS) was used to block the membrane for 1.5 h. Following this, the blots were incubated with primary antibodies for Akt, p-Akt, PI3K, p-PI3K, p65, IκBα, p-IκBα, IL-6, IL-β, TNF-α, TGF-β1, p-Smad2/3, Smad2/3, α-SMA, fibronectin, collagen IV, p27<sup>kip1</sup>, p21<sup>cip1</sup>, cyclin E, CDK2, iNOS, histone H1.4 and β-actin overnight at 4°C. The corresponding HRP-linked secondary antibody was

incubated with the blots for 1.5 h after washing with PBST three times. The blots were detected by ECL (enhanced chemiluminescence) and quantified by Quantity One.

## Statistical analysis

All experiments were performed at least in triplicate. Data were processed using SPSS 16.0 software (SPSS, Inc., Chicago, IL, USA) and are presented as the mean ± SD. Statistical analyses of the data were performed by one-way ANOVA using post hoc multiple comparisons; *p* < 0.05 was considered a significant difference.

## Ethics approval

This study was carried out in strict accordance with the recommendations of the Guide for the Care and Use of Laboratory Animals from the National Institutes of Health. All animal procedures were approved by the Ethical Committee for Animal Experiments of Southwest University (Permit Number: SYXK 2016-0002). All efforts were made to minimize suffering.

## Informed consent

Informed consent was obtained from all individual participants included in the study.

## Abbreviations

BUN: blood urea nitrogen; CAPE: caffeic acid phenethyl ester; CAPE-*p*NO<sub>2</sub>: caffeic acid para-nitro phenethyl ester; CKD: chronic kidney disease; DCFH-DA: 2',7'-dichlorofluorescein-diacetate; DMEM: Dulbecco's modified eagle medium; DMSO: dimethyl sulfoxide; DN: Diabetic Nephropathy; ECM: extracellular matrix; ESRD: end-stage renal disease; FBG: Fasting blood glucose; FBS: fetal bovine serum; GMCs: glomerular mesangial cells; HG: high D-glucose; iNOS: inducible nitric oxide synthase; IL-β: interleukin-1β; IL-6: interleukin-6; MDA: malondialdehyde; MPO: myeloperoxidase; MTT: 3-[4, 5-dimethyl-2-thiazolyl]-2,5-diphenyl-2-tetrazolium bromide; NO: Nitric oxide; PDTC: Ammonium pyrrolidinedithiocarbamate; PI: propidium iodide; ROS: reactive oxygen specie; STZ: streptozotocin; NOX4: NADPH oxidases 4; sCr: serum creatinine; SOD: superoxide dismutase; TC: Total cholesterol; TG: Total triglyceride; TNF-α: tumor necrosis factor-α; 24-Alb: 24- albumin.

## Author contributions

The study was designed by Wang X, Li Z and Zuo H. Xiao Q and Fan L were responsible for treating the animals, and Wang X and Li D took charge of the experiment after the samples were collected from the animals. The cell experiments were performed by Wang



X and Li D. Wang X and Li Z analyzed and interpreted the data. Wang X and Li Z drafted the paper, and all authors approved the final version of the article.

## ACKNOWLEDGMENTS AND FUNDING

We would like to thank the Fundamental Research Funds for the Central Universities, P. R. China (XDJK2016A015), and Shanxi Zhaoyi Biological Co Ltd, China (Grant No. SWU2013130), for the financial support.

## CONFLICTS OF INTEREST

The authors declare that there is no conflict of interest.

## REFERENCES

1. Ritz E, Rychlík I, Locatelli F, Halimi S. End-stage renal failure in type 2 diabetes: A medical catastrophe of worldwide dimensions. *Am J Kidney Dis.* 1999; 34:795–808. [https://doi.org/10.1016/S0272-6386\(99\)70035-1](https://doi.org/10.1016/S0272-6386(99)70035-1).
2. Vinod PB. Pathophysiology of diabetic nephropathy. *Clinical Queries. Nephrology (Carlton).* 2012; 1:121–26.
3. Ji X, Li C, Ou Y, Li N, Yuan K, Yang G, Chen X, Yang Z, Liu B, Cheung WW, Wang L, Huang R, Lan T. Andrographolide ameliorates diabetic nephropathy by attenuating hyperglycemia-mediated renal oxidative stress and inflammation via Akt/NF- $\kappa$ B pathway. *Mol Cell Endocrinol.* 2016; 437:268–79. <https://doi.org/10.1016/j.mce.2016.06.029>.
4. Catania JM, Chen G, Parrish AR. Role of matrix metalloproteinases in renal pathophysiology. *Am J Physiol Renal Physiol.* 2007; 292:F905–11. <https://doi.org/10.1152/ajprenal.00421.2006>.
5. Muskiet MH, Smits MM, Morsink LM, Diamant M. The gut-renal axis: do incretin-based agents confer renoprotection in diabetes? *Nat Rev Nephrol.* 2014; 10:88–103. <https://doi.org/10.1038/nrneph.2013.272>.
6. Mariappan MM. Signaling mechanisms in the regulation of renal matrix metabolism in diabetes. *Exp Diabetes Res.* 2012; 2012:749812. <https://doi.org/10.1155/2012/749812>.
7. Xu L, Shen P, Bi Y, Chen J, Xiao Z, Zhang X, Wang Z. Danshen injection ameliorates STZ-induced diabetic nephropathy in association with suppression of oxidative stress, pro-inflammatory factors and fibrosis. *Int Immunopharmacol.* 2016; 38:385–94. <https://doi.org/10.1016/j.intimp.2016.06.024>.
8. Schmid H, Boucherot A, Yasuda Y, Henger A, Brunner B, Eichinger F, Nitsche A, Kiss E, Bleich M, Gröne HJ, Nelson PJ, Schlöndorff D, Cohen CD, Kretzler M, and European Renal cDNA Bank (ERCB) Consortium. Modular activation of nuclear factor-kappaB transcriptional programs in human diabetic nephropathy. *Diabetes.* 2006; 55:2993–3003. <https://doi.org/10.2337/db06-0477>.
9. Kanwar YS, Sun L, Xie P, Liu FY, Chen S. A glimpse of various pathogenetic mechanisms of diabetic nephropathy. *Annu Rev Pathol.* 2011; 6:395–423. <https://doi.org/10.1146/annurev.pathol.4.110807.092150>.
10. Lim AK, Tesch GH. Inflammation in diabetic nephropathy. *Mediators Inflamm.* 2012; 2012:146154. <https://doi.org/10.1155/2012/146154>.
11. Donate-Correa J, Martín-Núñez E, Muros-de-Fuentes M, Mora-Fernández C, Navarro-González JF. Inflammatory cytokines in diabetic nephropathy. *J Diabetes Res.* 2015; 2015:948417. <https://doi.org/10.1155/2015/948417>.
12. Wada J, Makino H. Inflammation and the pathogenesis of diabetic nephropathy. *Clin Sci (Lond).* 2013; 124:139–52. <https://doi.org/10.1042/CS20120198>.
13. Liu W, Zhang X, Liu P, Shen X, Lan T, Li W, Jiang Q, Xie X, Huang H. Effects of berberine on matrix accumulation and NF-kappa B signal pathway in alloxan-induced diabetic mice with renal injury. *Eur J Pharmacol.* 2010; 638:150–55. <https://doi.org/10.1016/j.ejphar.2010.04.033>.
14. Kim SY, Park KH, Gul R, Jang KY, Kim UH. Role of kidney ADP-ribosyl cyclase in diabetic nephropathy. *Am J Physiol Renal Physiol.* 2009; 296:F291–97. <https://doi.org/10.1152/ajprenal.90381.2008>.
15. Sousa LP, Carmo AF, Rezende BM, Lopes F, Silva DM, Alessandri AL, Bonjardim CA, Rossi AG, Teixeira MM, Pinho V. Cyclic AMP enhances resolution of allergic pleurisy by promoting inflammatory cell apoptosis via inhibition of PI3K/Akt and NF-kappaB. *Biochem Pharmacol.* 2009; 78:396–405. <https://doi.org/10.1016/j.bcp.2009.04.030>.
16. Ru Y, Song HM. Progress in the research on the role of mesangial remodeling in glomerular diseases. [Article in Chinese] *Zhongguo Dang Dai Er Ke Za Zhi.* 2009; 11:866–68.
17. Moorhead JF, Chan MK, El-Nahas M, Varghese Z. Lipid nephrotoxicity in chronic progressive glomerular and tubulointerstitial disease. *Lancet.* 1982; 2:1309–11. [https://doi.org/10.1016/S0140-6736\(82\)91513-6](https://doi.org/10.1016/S0140-6736(82)91513-6).
18. Schlöndorff D, Banas B. The mesangial cell revisited: no cell is an island. *J Am Soc Nephrol.* 2009; 20:1179–87. <https://doi.org/10.1681/ASN.2008050549>.
19. Abboud HE. Mesangial cell biology. *Exp Cell Res.* 2012; 318:979–85. <https://doi.org/10.1016/j.yexcr.2012.02.025>.
20. Ziyadeh FN. The extracellular matrix in diabetic nephropathy. *Am J Kidney Dis.* 1993; 22:736–44. [https://doi.org/10.1016/S0272-6386\(12\)80440-9](https://doi.org/10.1016/S0272-6386(12)80440-9).
21. Lee HB, Yu MR, Yang Y, Jiang Z, Ha H. Reactive oxygen species-regulated signaling pathways in diabetic nephropathy. *J Am Soc Nephrol.* 2003; 14:S241–45. <https://doi.org/10.1097/01.ASN.0000077410.66390.0F>.
22. Wang X, Shaw S, Amiri F, Eaton DC, Marrero MB. Inhibition of the Jak/STAT signaling pathway prevents the high glucose-induced increase in tgf-beta and fibronectin synthesis in mesangial cells. *Diabetes.* 2002; 51:3505–09. <https://doi.org/10.2337/diabetes.51.12.3505>.
23. Lal MA, Brismar H, Eklöf AC, Aperia A. Role of oxidative stress in advanced glycation end product-induced mesangial

- cell activation. *Kidney Int.* 2002; 61:2006–14. <https://doi.org/10.1046/j.1523-1755.2002.00367.x>.
24. Murtaza G, Karim S, Akram MR, Khan SA, Azhar S, Mumtaz A, Bin Asad MH. Caffeic acid phenethyl ester and therapeutic potentials. *BioMed Res Int.* 2014; 2014:145342. <https://doi.org/10.1155/2014/145342>.
  25. Tolba MF, Azab SS, Khalifa AE, Abdel-Rahman SZ, Abdel-Naim AB. Caffeic acid phenethyl ester, a promising component of propolis with a plethora of biological activities: a review on its anti-inflammatory, neuroprotective, hepatoprotective, and cardioprotective effects. *IUBMB Life.* 2013; 65:699–709. <https://doi.org/10.1002/iub.1189>.
  26. Chuang ST, Kuo YH, Su MJ. KS370G, a caffeamide derivative, attenuates unilateral ureteral obstruction-induced renal fibrosis by the reduction of inflammation and oxidative stress in mice. *Eur J Pharmacol.* 2015; 750:1–7. <https://doi.org/10.1016/j.ejphar.2015.01.020>.
  27. Yang N, Dang S, Shi J, Wu F, Li M, Zhang X, Li Y, Jia X, Zhai S. CAPE attenuates liver fibrosis via inhibition of TGF- $\beta$ 1/Smad3 pathway and induction of autophagy pathway. *Biochem Biophys Res Commun.* 2017; 86:22–28. <https://doi.org/10.1016/j.bbrc.2017.02.057>.
  28. Dellamea BS, Leitão CB, Friedman R, Canani LH. Nitric oxide system and diabetic nephropathy. *Diabetol Metab Syndr.* 2014; 6:17. <https://doi.org/10.1186/1758-5996-6-17>.
  29. Turnbull E, MacPherson G. Immunobiology of dendritic cells in the rat. *Immunol Rev.* 2001; 184:58–68. <https://doi.org/10.1034/j.1600-065x.2001.1840106.x>.
  30. Achar SA, Kundu S, Norcross WA. Diagnosis of acute coronary syndrome. *Am Fam Physician.* 2005; 72:119–26.
  31. Nakagawa T, Segal M, Croker B, Johnson RJ. A breakthrough in diabetic nephropathy: the role of endothelial dysfunction. *Nephrol Dial Transplant.* 2007; 22:2775–77. <https://doi.org/10.1093/ndt/gfm380>.
  32. Witte MB, Barbul A. Role of nitric oxide in wound repair. *Am J Surg.* 2002; 183:406–12. [https://doi.org/10.1016/S0002-9610\(02\)00815-2](https://doi.org/10.1016/S0002-9610(02)00815-2).
  33. Shao YX, Xu XX, Li YY, Qi XM, Wang K, Wu YG, Meng XM. Paeoniflorin inhibits high glucose-induced through TLR2-dependent signal pathways. *J Ethnopharmacol.* 2016; 193:377–86. <https://doi.org/10.1016/j.jep.2016.08.035>.
  34. Carreño AL, Alday E, Quintero J, Pérez L, Valencia D, Robles-Zepeda R, Valdez-Ortega J, Hernandez J, Velazquez C. Protective effect of CAPE against oxidative stress. *J Funct Foods.* 2016; 29:178–84. <https://doi.org/10.1016/j.jff.2016.12.008>.
  35. Song JJ, Lim HW, Kim K, Kim KM, Cho S, Chae SW. Effect of caffeic acid phenethyl ester (CAPE) on H<sub>2</sub>O<sub>2</sub> induced oxidative and inflammatory responses in human middle ear epithelial cells. *Int J Pediatr Otorhi.* 2012; 76:675–79. <https://doi.org/10.1016/j.ijporl.2012.01.041>.
  36. Bezerra RM, Veiga LF, Caetano AC, Rosalen PL, Amaral ME, Palanch AC, de Alencar SM. Caffeic acid phenethyl ester reduces the activation of the nuclear factor  $\kappa$ B pathway by high-fat diet-induced obesity in mice. *Metabolism.* 2012; 61:1606–14. <https://doi.org/10.1016/j.metabol.2012.04.006>.
  37. Li L, Sun W, Wu T, Lu R, Shi B. Caffeic acid phenethyl ester attenuates lipopolysaccharide-stimulated proinflammatory responses in human gingival fibroblasts via NF- $\kappa$ B and PI3K/Akt signaling pathway. *Eur J Pharmacol.* 2017; 794:61–68. <https://doi.org/10.1016/j.ejphar.2016.11.003>.
  38. Lee Y, Shin DH, Kim JH, Honga S, Choi D, Kim YJ, Kwak MK, Jung Y. CAPE mediated Nrf2 activation and IKK kinase inhibit involve in NF- $\kappa$ B inhibitory effect: structural analysis for NF- $\kappa$ B inhibition. *Eur J Pharmacol.* 2010; 643:21–28. <https://doi.org/10.1016/j.ejphar.2010.06.016>.
  39. Liu T, Deng L, Du Q, Chen L, Liu X, Li Z. Novel caffeic acid phenethyl ester (CAPE) analogues as immunoregulatory agents: synthesis and SAR study. *Lat Am J Pharm.* 2013; 32:329–34.
  40. Du Q, Hao C, Gou J, Li X, Zou K, He X, Li Z. Protective effects of p-nitro caffeic acid phenethyl ester on acute myocardial ischemia-reperfusion injury in rats. *Exp Ther Med.* 2016; 11:1433–40. <https://doi.org/10.3892/etm.2016.3070>.
  41. Xu F, Wang Y, Cui W, Yuan H, Sun J, Wu M, Guo Q, Kong L, Wu H, Miao L. Resveratrol prevention of diabetic nephropathy is associated with the suppression of renal inflammation and mesangial cell proliferation: possible roles of Akt/NF- $\kappa$ B pathway. *Int J Endocrinol.* 2014; 2014:289327. <https://doi.org/10.1155/2014/289327>.
  42. Tang H, Yao X, Yao C, Zhao X, Zuo H, Li Z. Anti-colon cancer effect of caffeic acid p-nitro-phenethyl ester *in vitro* and *in vivo* and detection of its metabolites. *Sci Rep.* 2017; 7:7599. <https://doi.org/10.1038/s41598-017-07953-8>.
  43. Celik S, Erdogan S, Tuzcu M. Caffeic acid phenethyl ester (CAPE) exhibits significant potential as an antidiabetic and liver-protective agent in streptozotocin-induced diabetic rats. *Pharmacol Res.* 2009; 60:270–76. <https://doi.org/10.1016/j.phrs.2009.03.017>.
  44. Zhang Z, Zhang D, Dou M, Li Z, Zhang J, Zhao X. *Dendrobium officinale* Kimura et Migo attenuates diabetic cardiomyopathy through inhibiting oxidative stress, inflammation and fibrosis in streptozotocin-induced mice. *Biomed Pharmacother.* 2016; 84:1350–58. <https://doi.org/10.1016/j.biopha.2016.10.074>.
  45. Chuang ST, Kuo YH, Su MJ. Antifibrotic effects of KS370G, a caffeamide derivative, in renal ischemia-reperfusion injured mice and renal tubular epithelial cells. *Sci Rep.* 2014; 4:5814. <https://doi.org/10.1038/srep05814>.
  46. Declèves AE, Sharma K. New pharmacological treatments for improving renal outcomes in diabetes. *Nat Rev Nephrol.* 2010; 6:371–80. <https://doi.org/10.1038/nrneph.2010.57>.
  47. Liu CM, Qi XL, Yang YF, Zhang XD. Betulinic acid inhibits cell proliferation and fibronectin accumulation in rat glomerular mesangial cells cultured under high glucose condition. *Biomed Pharmacother.* 2016; 80:338–42. <https://doi.org/10.1016/j.biopha.2016.02.040>.

48. Okada T, Wada J, Hida K, Eguchi J, Hashimoto I, Baba M, Yasuhara A, Shikata K, Makino H. Thiazolidinediones ameliorate diabetic nephropathy via cell cycle-dependent mechanisms. *Diabetes*. 2006; 55:1666–77. <https://doi.org/10.2337/db05-1285>.
49. Wolf G, Schroeder R, Ziyadeh FN, Thaiss F, Zahner G, Stahl RA. High glucose stimulates expression of p27Kip1 in cultured mouse mesangial cells: relationship to hypertrophy. *Am J Physiol*. 1997; 273:F348–56.
50. Jia H, Qi X, Fang S, Jin Y, Han X, Wang Y, Wang A, Zhou H. Carnosine inhibits high glucose-induced mesangial cell proliferation through mediating cell cycle progression. *Regul Pept*. 2009; 154:69–76. <https://doi.org/10.1016/j.regpep.2008.12.004>.
51. Ke YQ, Liu C, Hao JB, Lu L, Lu NN, Wu ZK, Zhu SS, Chen XL. Morin inhibits cell proliferation and fibronectin accumulation in rat glomerular mesangial cells cultured under high glucose condition. *Biomed Pharmacother*. 2016; 84:622–27. <https://doi.org/10.1016/j.biopha.2016.09.088>.
52. Tan AL, Forbes JM, Cooper ME. AGE, RAGE, and ROS in diabetic nephropathy. *Semin Nephrol*. 2007; 27:130–43. <https://doi.org/10.1016/j.semnephrol.2007.01.006>.
53. Ha H, Hwang IA, Park JH, Lee HB. Role of reactive oxygen species in the pathogenesis of diabetic nephropathy. *Diabetes Res Clin Pract*. 2008 (Suppl 1); 82:S42–45. <https://doi.org/10.1016/j.diabres.2008.09.017>.
54. Karasu C. Glycoxidative stress and cardiovascular complications in experimentally-induced diabetes: effects of antioxidant treatment. *Open Cardiovasc Med J*. 2010; 4:240–56. <https://doi.org/10.2174/1874192401004010240>.
55. Xie X, Chang X, Chen L, Huang K, Huang J, Wang S, Shen X, Liu P, Huang H. Berberine ameliorates experimental diabetes-induced renal inflammation and fibronectin by inhibiting the activation of RhoA/ROCK signaling. *Mol Cell Endocrinol*. 2013; 381:56–65. <https://doi.org/10.1016/j.mce.2013.07.019>.
56. Eid AA, Gorin Y, Fagg BM, Maalouf R, Barnes JL, Block K, Abboud HE. Mechanisms of podocyte injury in diabetes: role of cytochrome P450 and NADPH oxidases. *Diabetes*. 2009; 58:1201–11. <https://doi.org/10.2337/db08-1536>.
57. Eid AA, Ford BM, Block K, Kasinath BS, Gorin Y, Ghosh-Choudhury G, Barnes JL, Abboud HE. AMP-activated protein kinase (AMPK) negatively regulates Nox4-dependent activation of p53 and epithelial cell apoptosis in diabetes. *J Biol Chem*. 2010; 285:37503–12. <https://doi.org/10.1074/jbc.M110.136796>.
58. Fujii M, Inoguchi T, Maeda Y, Sasaki S, Sawada F, Saito R, Kobayashi K, Sumimoto H, Takayanagi R. Pitavastatin ameliorates albuminuria and renal mesangial expansion by downregulating NOX4 in db/db mice. *Kidney Int*. 2007; 72:473–80. <https://doi.org/10.1038/sj.ki.5002366>.
59. Fujii M, Inoguchi T, Sasaki S, Maeda Y, Zheng J, Kobayashi K, Takayanagi R. Bilirubin and biliverdin protect rodents against diabetic nephropathy by downregulating NAD(P)H oxidase. *Kidney Int*. 2010; 78:905–19. <https://doi.org/10.1038/ki.2010.265>.
60. Taniyama Y, Griendling KK. Reactive oxygen species in the vasculature: molecular and cellular mechanisms. *Hypertension*. 2003; 42:1075–81. <https://doi.org/10.1161/01.HYP.0000100443.09293.4F>.
61. Rajendrasozhan S, Yang SR, Edirisinghe I, Yao H, Adenuga D, Rahman I. Deacetylases and NF-kappaB in redox regulation of cigarette smoke-induced lung inflammation: epigenetics in pathogenesis of COPD. *Antioxid Redox Signal*. 2008; 10:799–811. <https://doi.org/10.1089/ars.2007.1938>.
62. Xie X, Peng J, Huang K, Huang J, Shen X, Liu P, Huang H. Polydatin ameliorates experimental diabetes-induced fibronectin through inhibiting the activation of NF-kB signaling pathway in rat glomerular mesangial cells. *Mol Cell Endocrinol*. 2012; 362:183–93. <https://doi.org/10.1016/j.mce.2012.06.008>.
63. Zhai YP, Lu Q, Liu YW, Cheng Q, Wei YQ, Zhang F, Li CL, Yin XX. Over-production of nitric oxide by oxidative stress-induced activation of the TGF-β1/PI3K/Akt pathway in mesangial cells cultured in high glucose. *Acta Pharmacol Sin*. 2013; 34:507–14. <https://doi.org/10.1038/aps.2012.207>.
64. Binder BR, Christ G, Gruber F, Grubic N, Hufnagl P, Krebs M, Mihaly J, Prager GW. Plasminogen activator inhibitor 1: physiological and pathophysiological roles. *News Physiol Sci*. 2002; 17:56–61.
65. Lan Y, Zhou Q, Wu ZL. NF-kappa B involved in transcription enhancement of TGF-beta 1 induced by Ox-LDL in rat mesangial cells. *Chin Med J (Engl)*. 2004; 117:225–30.
66. Raptis AE, Viberti G. Pathogenesis of diabetic nephropathy. *Exp Clin Endocrinol Diabetes*. 2001 (Suppl 2); 109:S424–37. <https://doi.org/10.1055/s-2001-18600>.
67. Baccora MH, Cortes P, Hassett C, Taube DW, Yee J. Effects of long-term elevated glucose on collagen formation by mesangial cells. *Kidney Int*. 2007; 72:1216–25. <https://doi.org/10.1038/sj.ki.5002517>.
68. Daniels A, van Bilsen M, Goldschmeding R, van der Vusse GJ, van Nieuwenhoven FA. Connective tissue growth factor and cardiac fibrosis. *Acta Physiol (Oxf)*. 2009; 195:321–38. <https://doi.org/10.1111/j.1748-1716.2008.01936.x>.
69. Heldin CH, Miyazono K, ten Dijke P. TGF-beta signalling from cell membrane to nucleus through SMAD proteins. *Nature*. 1997; 390:465–71. <https://doi.org/10.1038/37284>.
70. Inam A, Shahzad M, Shabbir A, Shahid H, Shahid K, Javeed A. Carica papaya ameliorates allergic asthma via down regulation of IL-4, IL-5, eotaxin, TNF-α, NF-κB, and iNOS levels. *Phytomedicine*. 2017; 32:1–7. <https://doi.org/10.1016/j.phymed.2017.04.009>.
71. Mitani T, Terashima M, Yoshimura H, Nariai Y, Tanigawa Y. TGF-β1 enhances degradation of IFN-γ-induced iNOS protein via proteasomes in RAW 264.7 cells. *Nitric Oxide*. 2005; 13:78–87. <https://doi.org/10.1016/j.niox.2005.05.001>.

72. Vodovotz Y, Bogdan C, Paik J, Xie QW, Nathan C. Mechanisms of suppression of macrophage nitric oxide release by transforming growth factor beta. *J Exp Med.* 1993; 178:605–13. <https://doi.org/10.1084/jem.178.2.605>.
73. Ma C, Ge X, Zhu Y, Wang L. Study on electroreduction performance and mechanism of substituted aryl nitrobenzene. *J Chem Eng of Chinese Univ.* 2006; 05:728–33.
